# Supplementary material for: Synthesis and stability study of a new major metabolite of γ-hydroxybutyric acid
Source: publisher site journal article supplement (doi:10.3762/bjoc.9.72), 2013-04-02
Supplement: Additional file 1 [file 1860-5397-9-72-S1.pdf]

**Supporting Information**  
**for**  
**Synthesis and stability study of a new major metabolite of**  
 **$\gamma$ -hydroxybutyric acid**

Ida Nymann Petersen<sup>1</sup>, Jesper Langgaard Kristensen<sup>1</sup>, Christian Tortzen<sup>2</sup>, Torben Breindahl<sup>3</sup> and Daniel Sejer Pedersen<sup>\*1</sup>

Address: <sup>1</sup>Department of Drug Design and Pharmacology, University of Copenhagen, Universitetsparken 2, DK-2100 Copenhagen, Denmark, <sup>2</sup>Department of Chemistry, University of Copenhagen, Universitetsparken 5, DK-2100 Copenhagen, Denmark and <sup>3</sup>Department of Clinical Biochemistry, Vendsyssel Hospital, Bispensgade 37, DK-9800 Hjørring, Denmark

Email: Daniel Sejer Pedersen – daniel.pedersen@sund.ku.dk

\* Corresponding author

**1D and 2D NMR spectra for 2 and  $d_4$ -2 and all details for the NMR stability study of GHB glucuronide 2**

## Table of Contents

### 1. NMR characterisation

|                                                                           |    |
|---------------------------------------------------------------------------|----|
| 1.1 1D and 2D NMR spectra of glucuronide <b>2</b>                         | S3 |
| 1.2 1D and 2D NMR spectra of glucuronide <i>d</i> <sub>4</sub> - <b>2</b> | S8 |

### 2. NMR stability study for GHB-GLUC (2)

|                                                    |     |
|----------------------------------------------------|-----|
| 2.1 General NMR experimental                       | S13 |
| 2.2 NMR stability study <sup>1</sup> H NMR spectra | S15 |
| 2.3 NMR reference spectra                          | S18 |

1.1 1D and 2D NMR spectra of glucuronide 2

<sup>1</sup>H NMR spectrum of GHB glucuronide 2

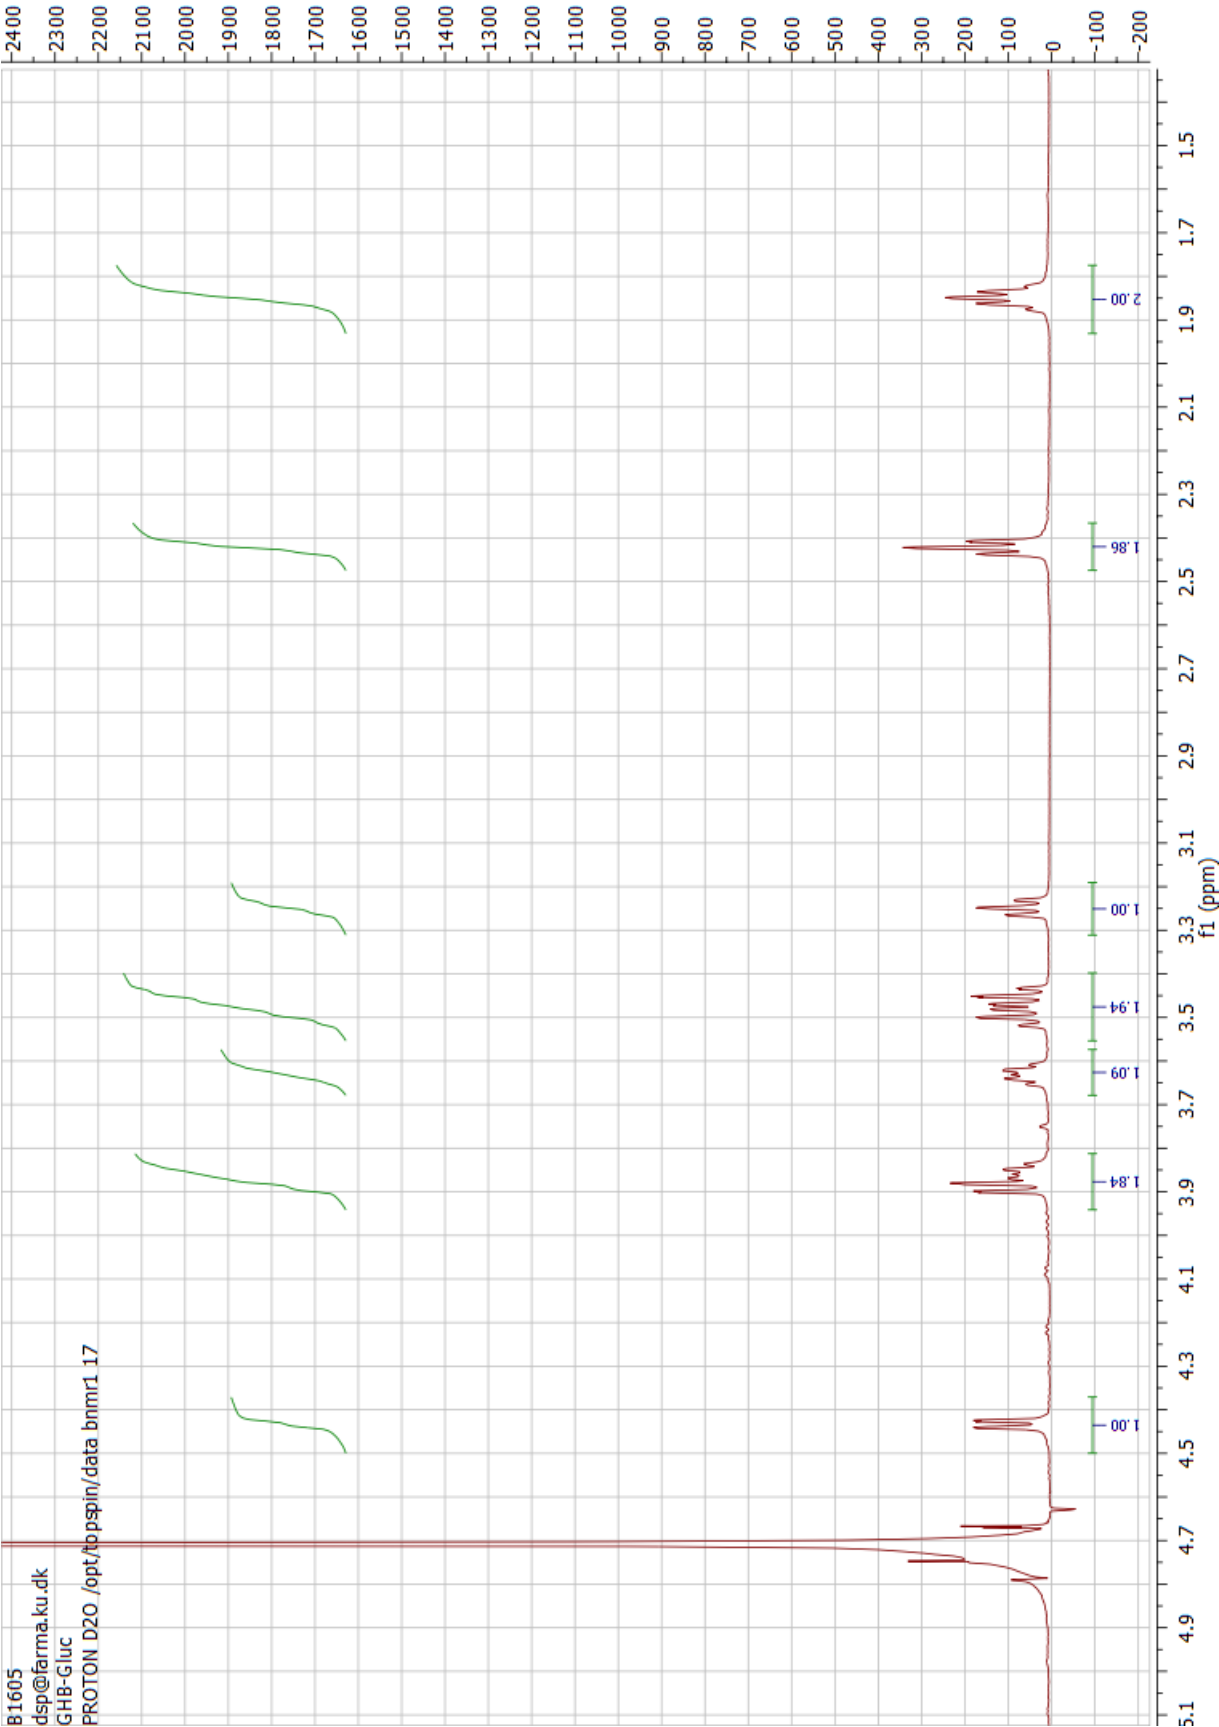

COSY NMR spectrum of GHB glucuronide 2

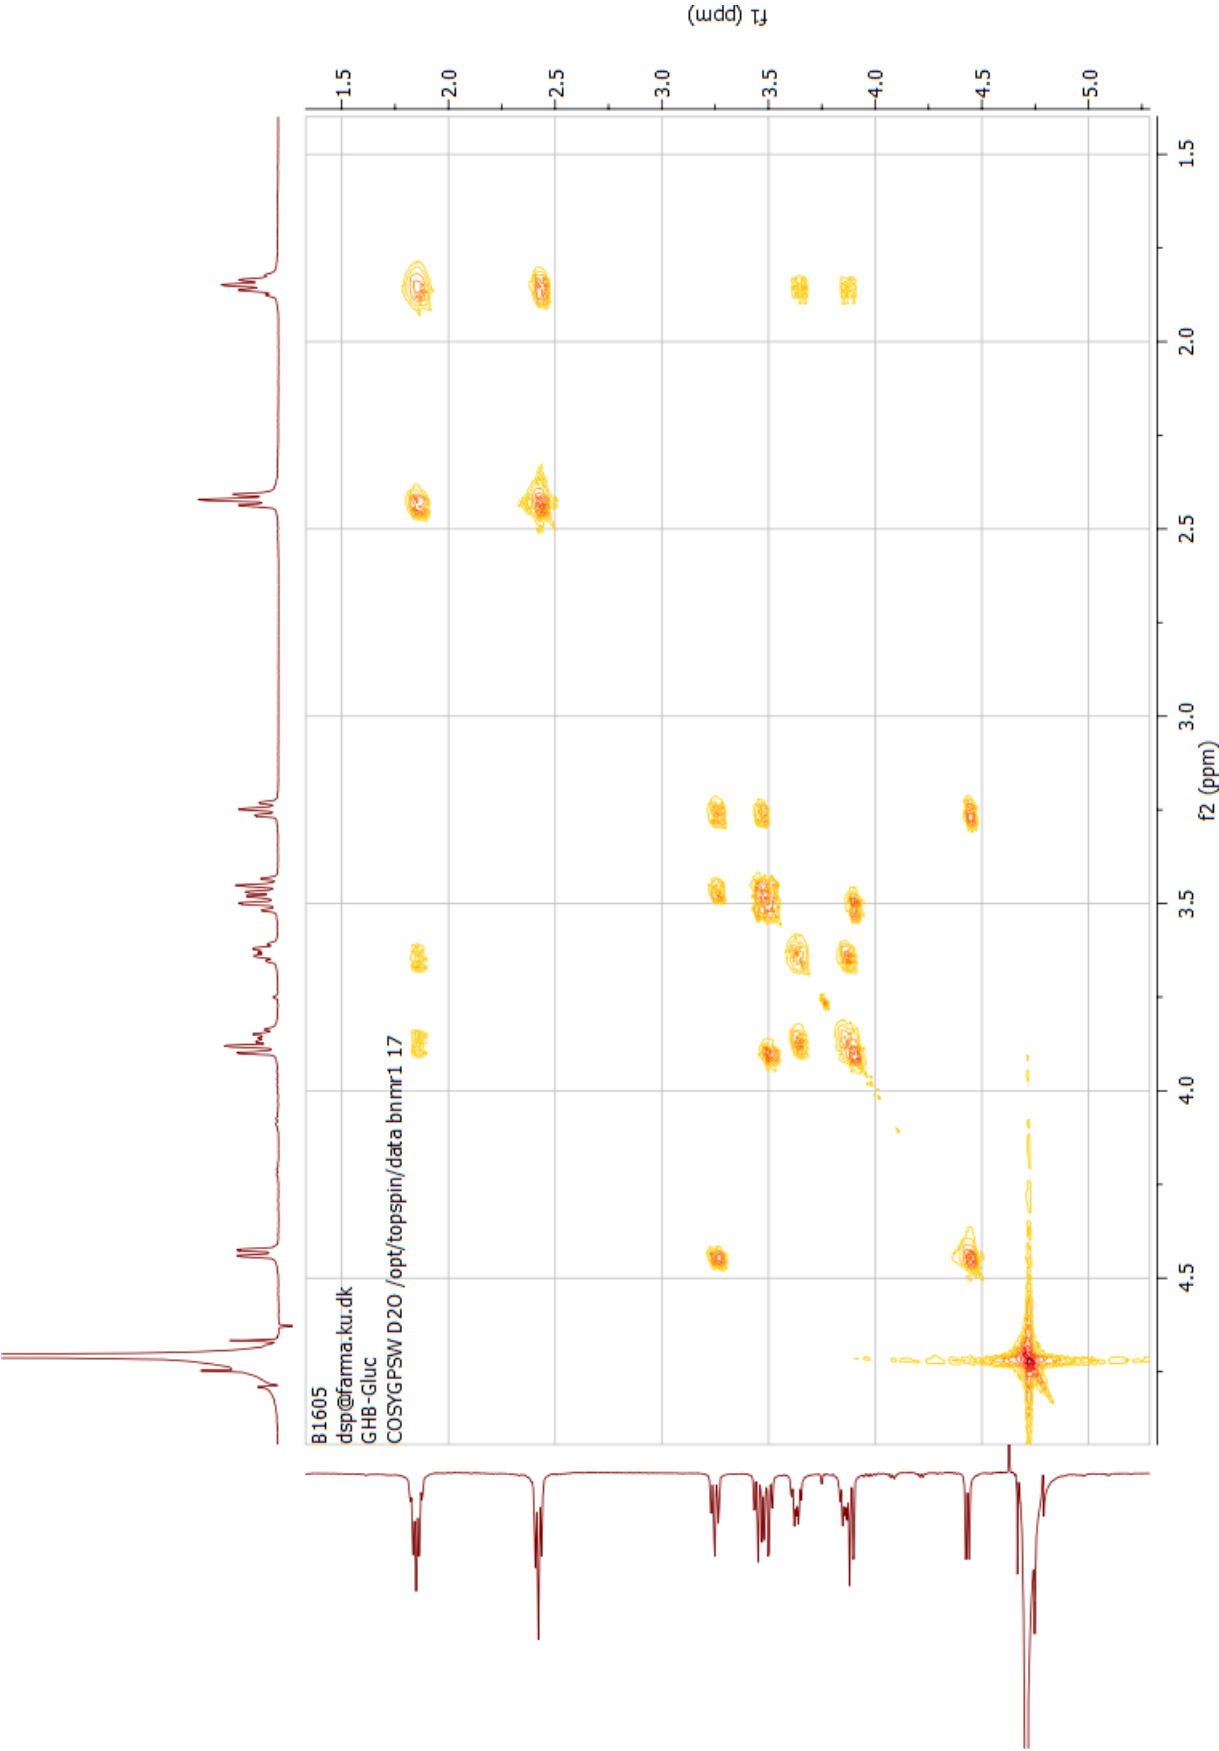

**<sup>13</sup>C APT NMR spectrum of GHB glucuronide 2**

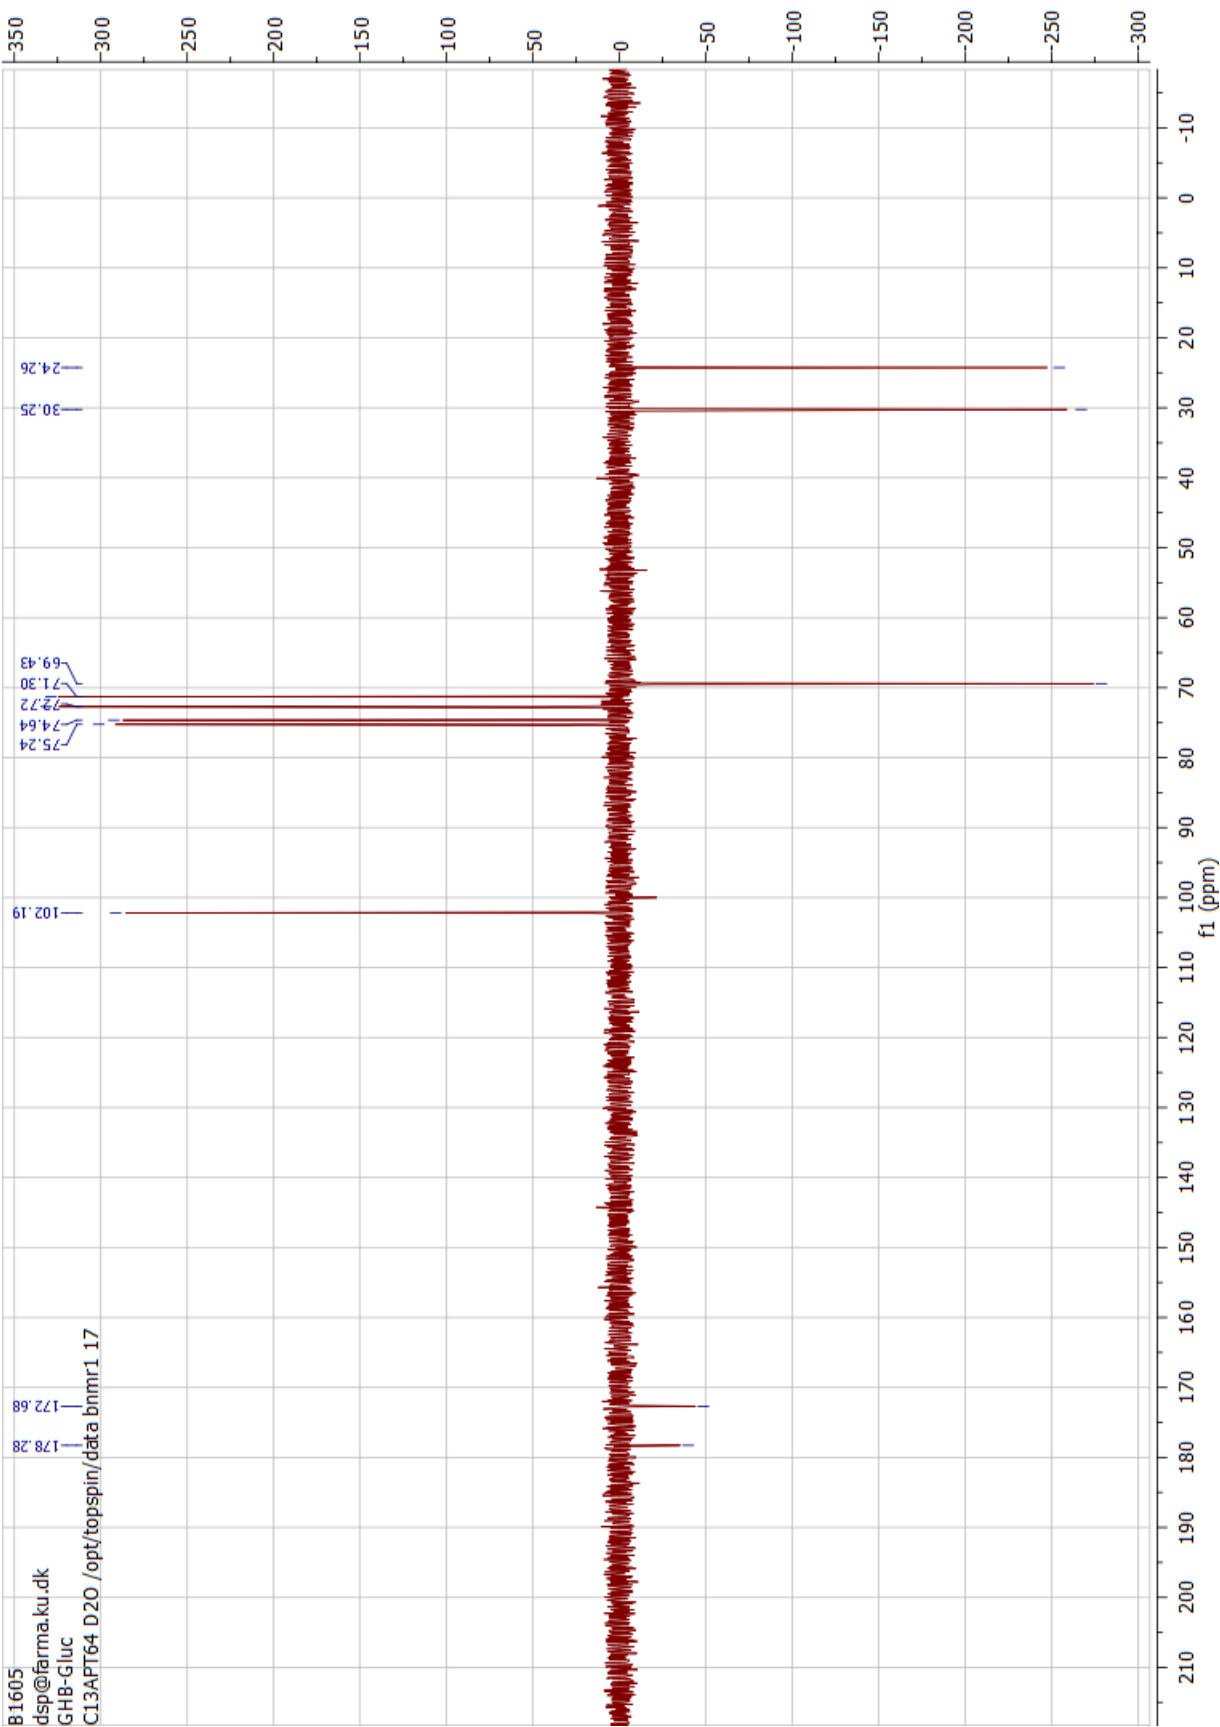

HSQC NMR spectrum of GHB glucuronide 2

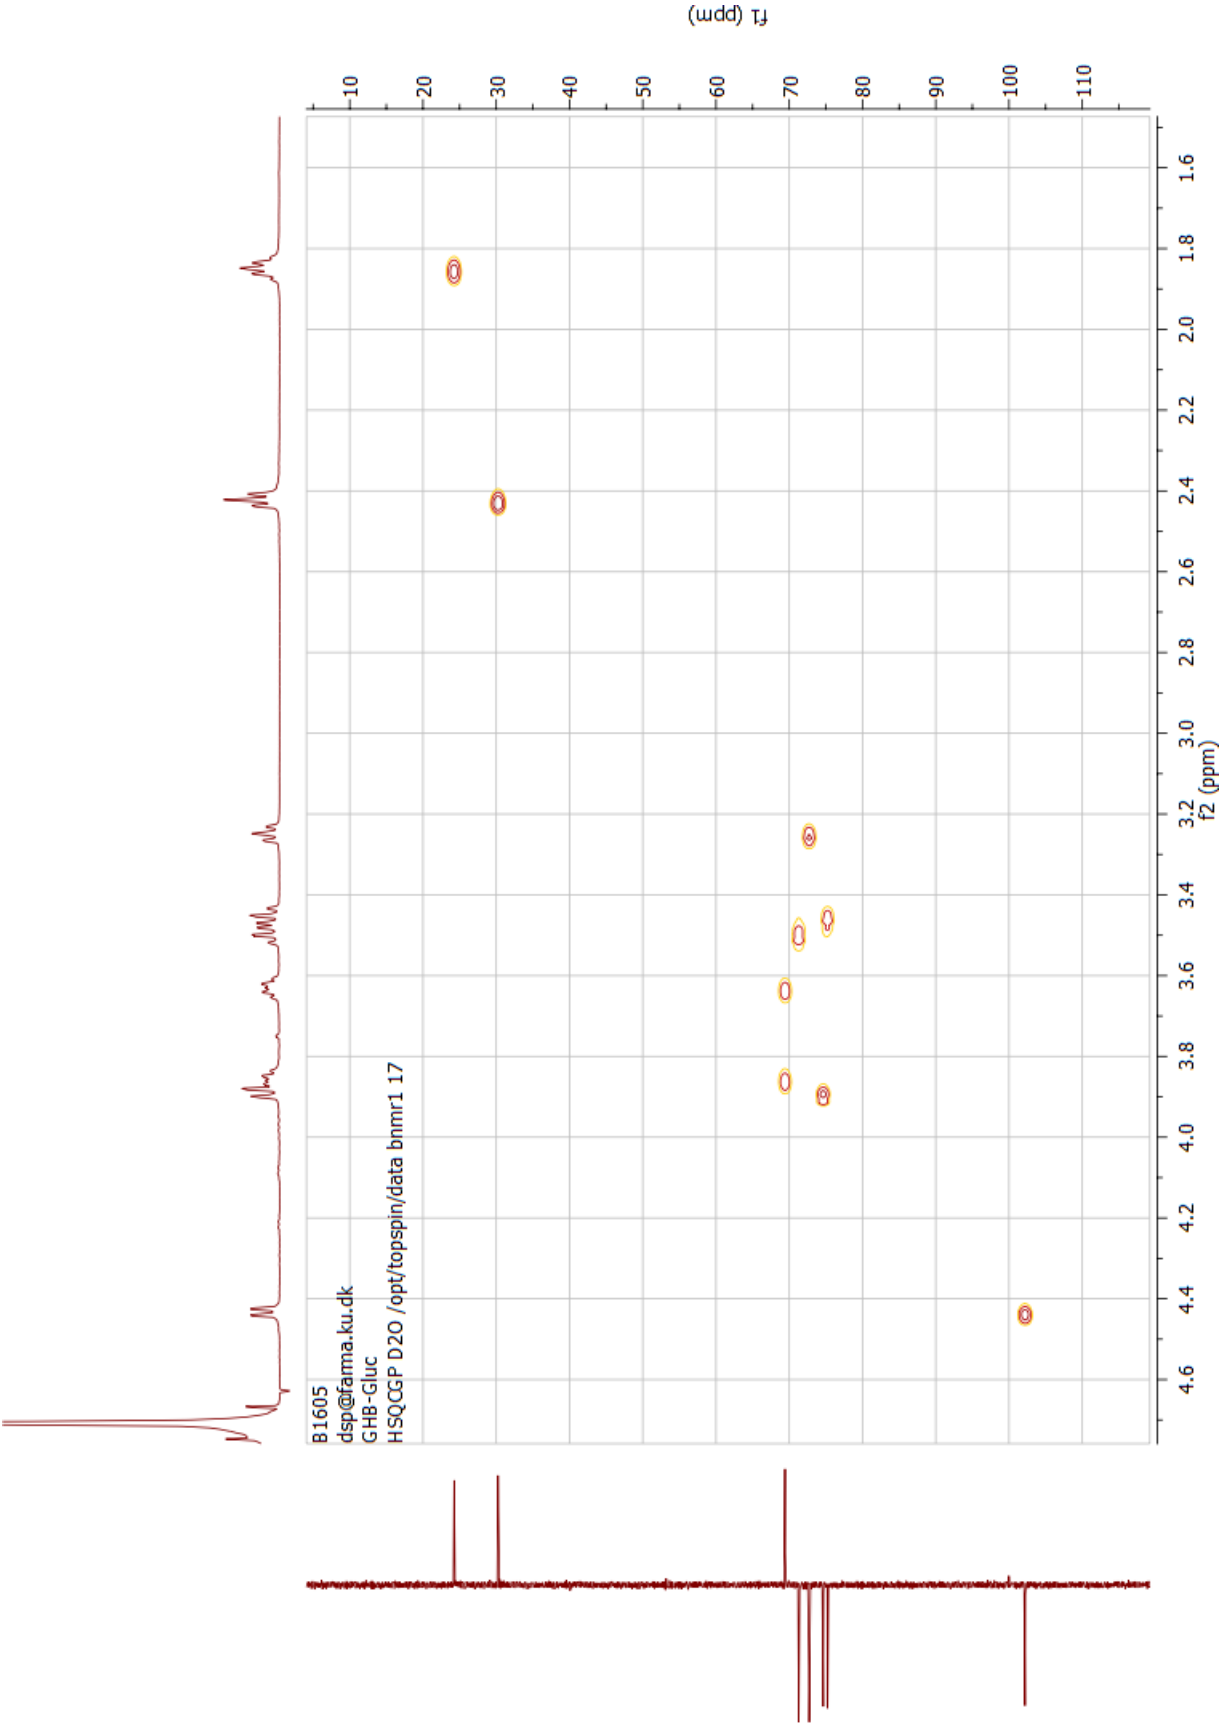

HMBC NMR spectrum of GHB glucuronide 2

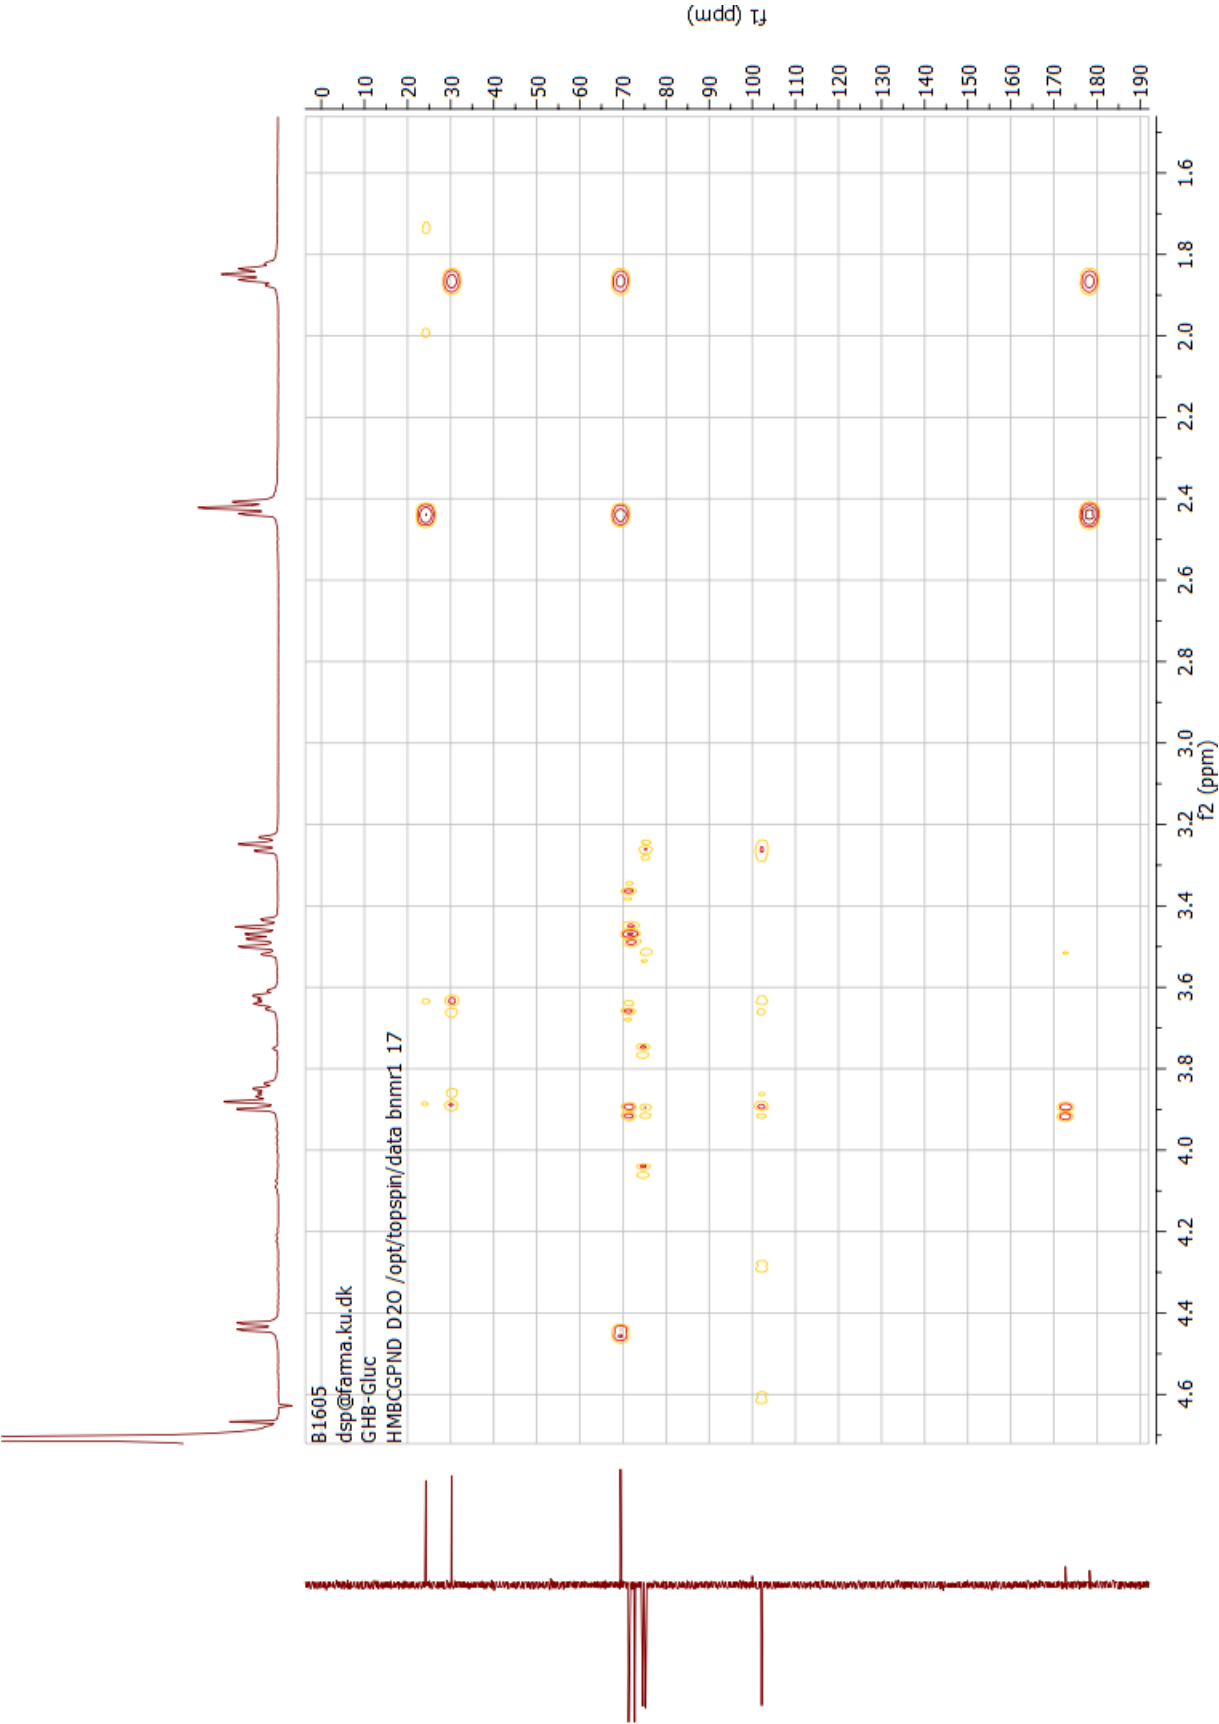

1.2 1D and 2D NMR spectra of glucuronide *d*<sub>4</sub>-2

<sup>1</sup>H NMR spectra of GHB glucuronide *d*<sub>4</sub>-2

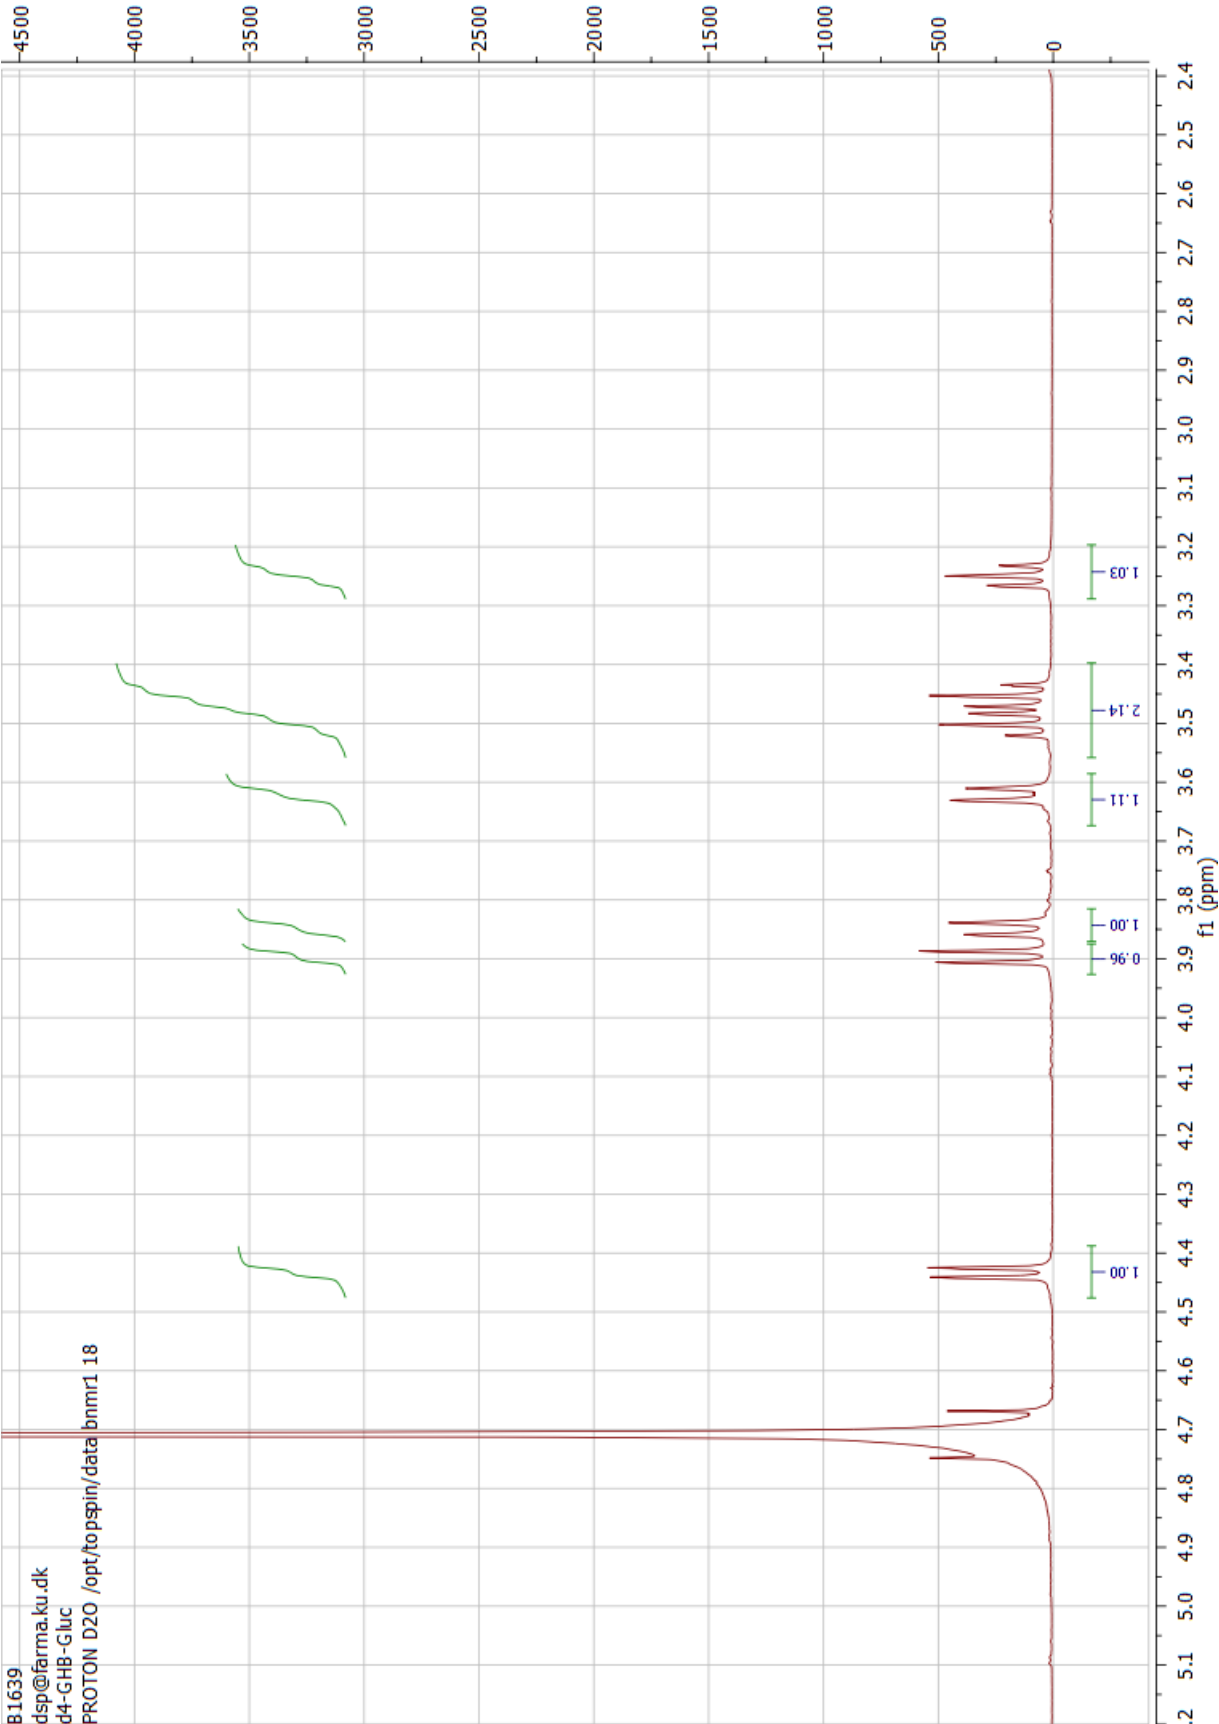



B1606  
dsp@farma.ku.dk  
d4-GHB-Gluc  
COSYGPW D20 /opt/topspin/data/bnmr1 18

**<sup>13</sup>C NMR of GHB glucuronide *d*<sub>4</sub>-2**

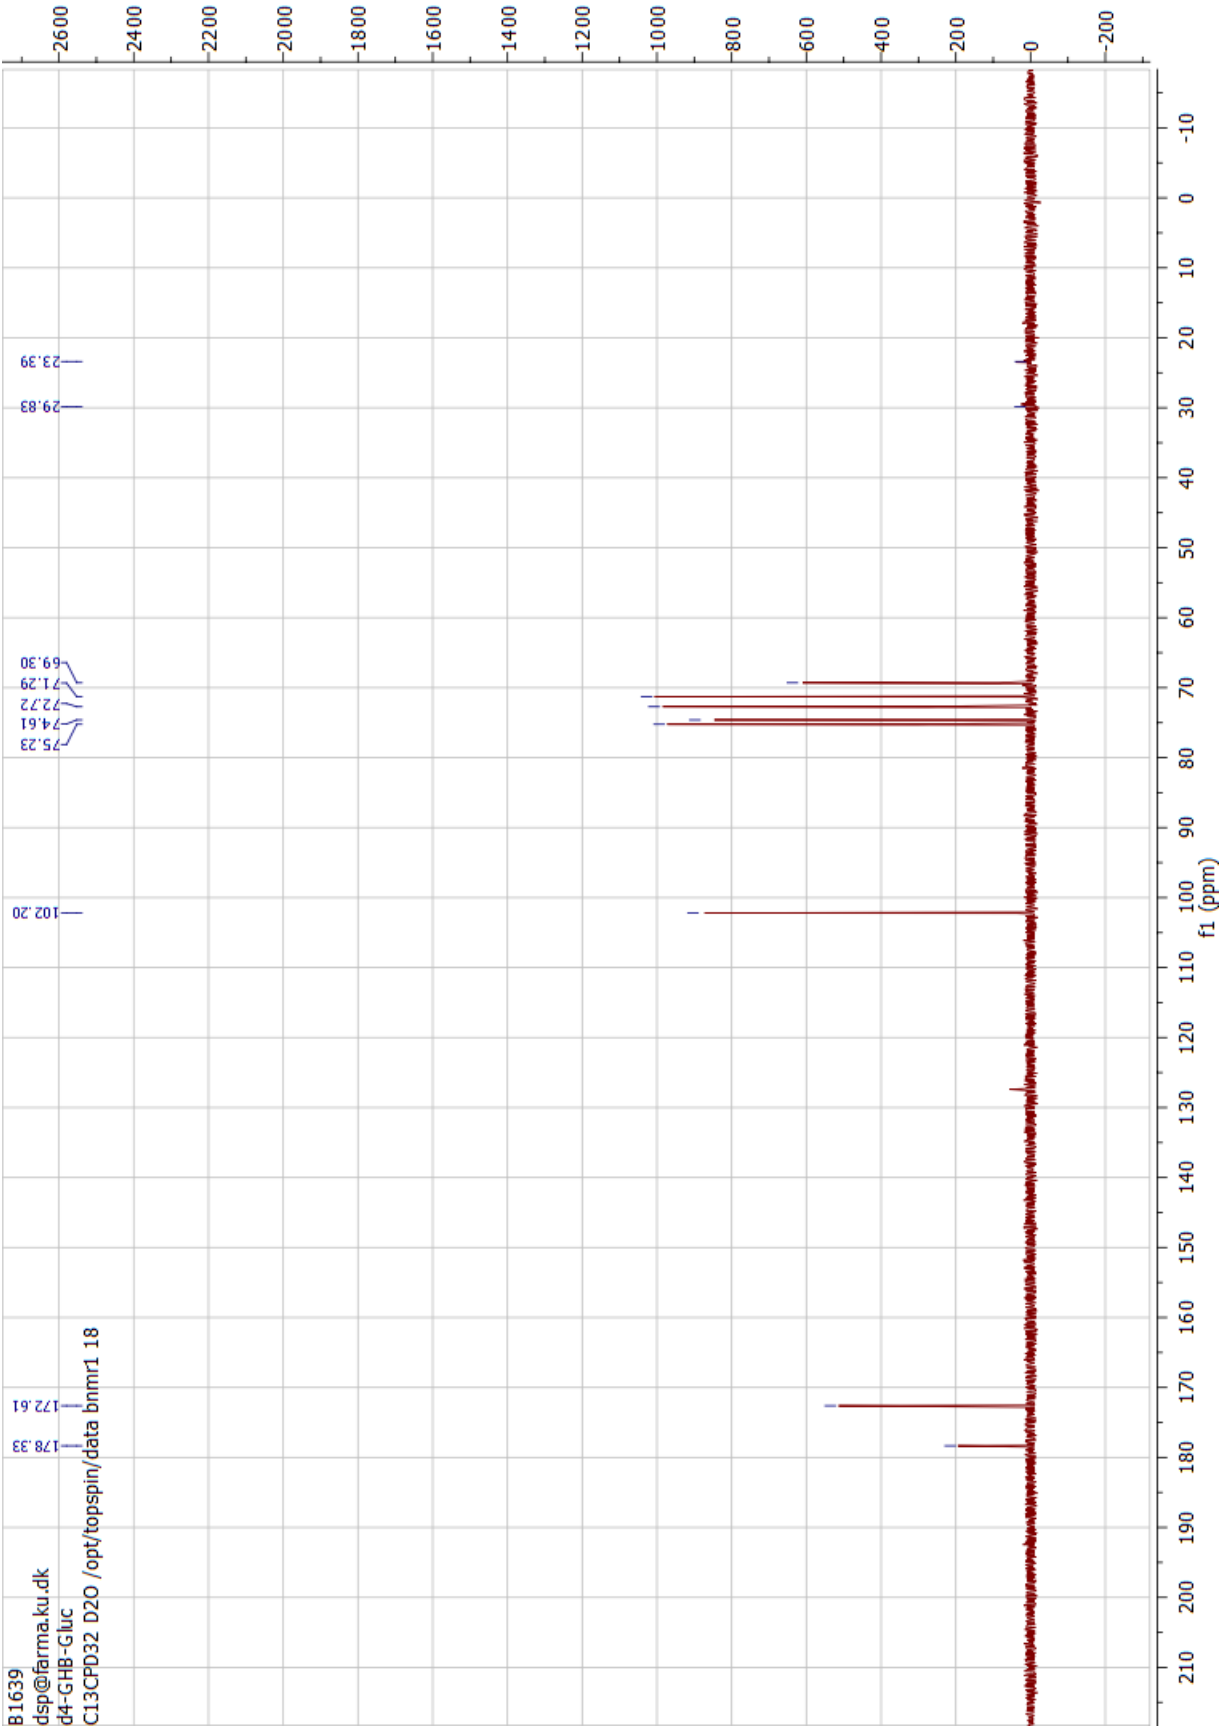

HSQC NMR of GHB glucuronide *d*<sub>4</sub>-2

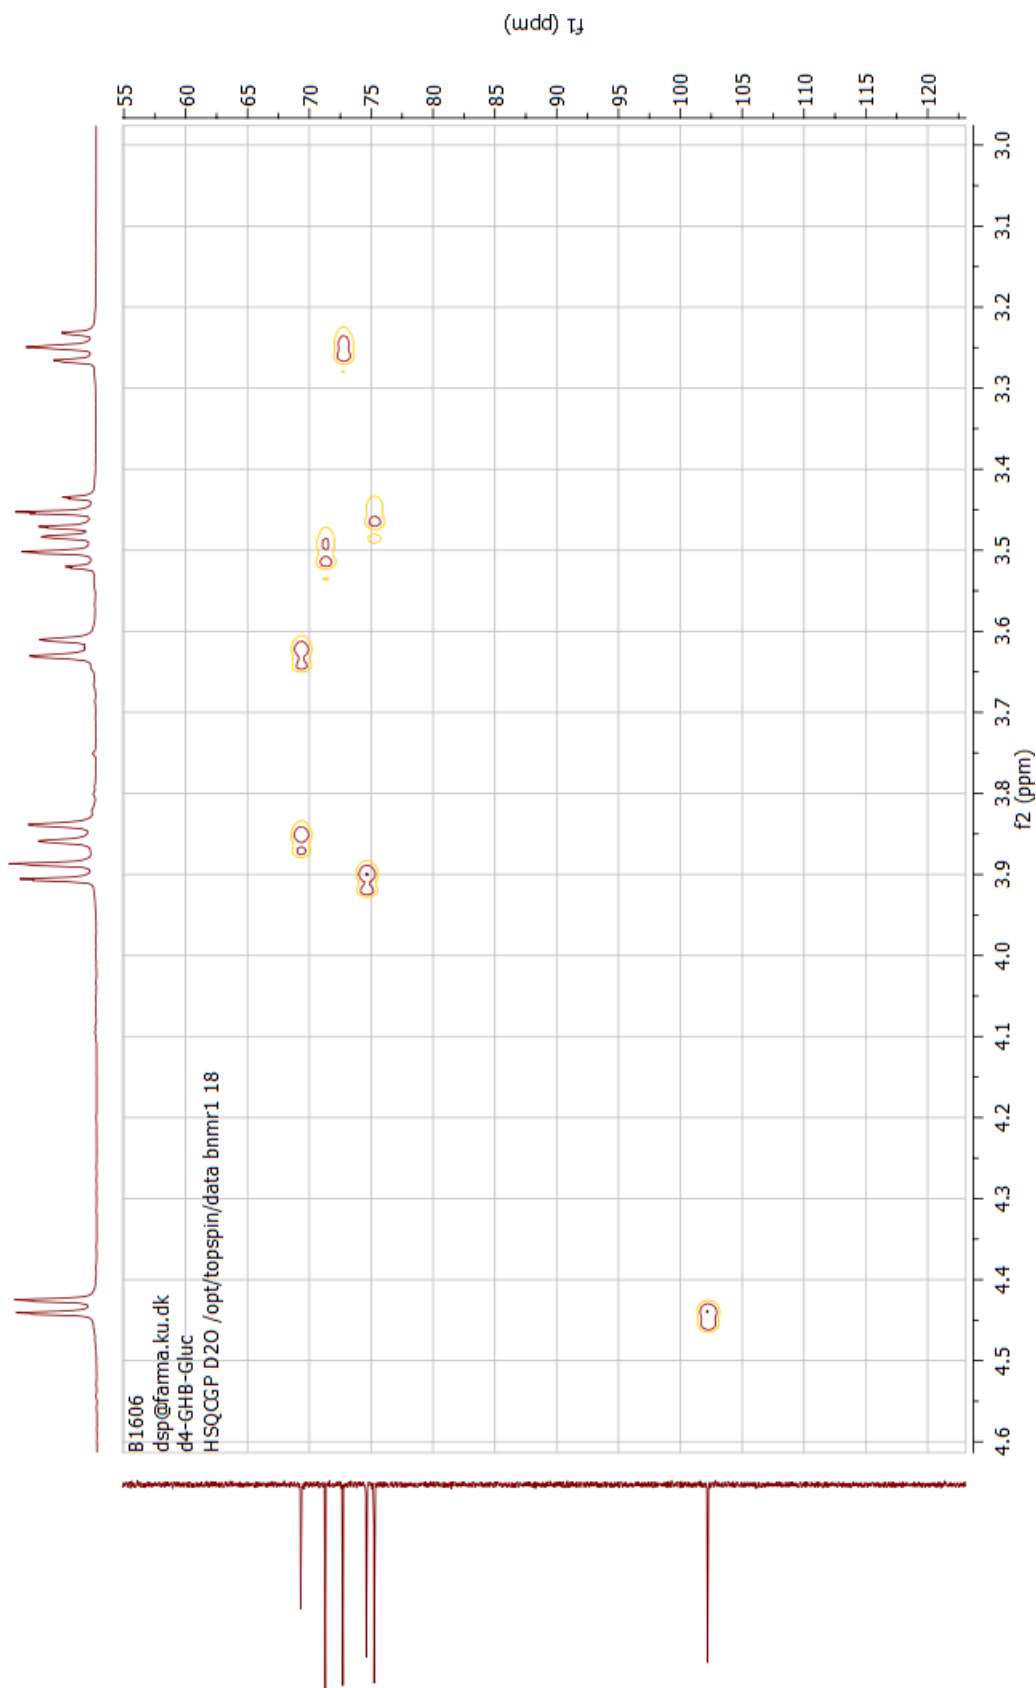

### HMBC NMR of GHB glucuronide $d_4$ -2

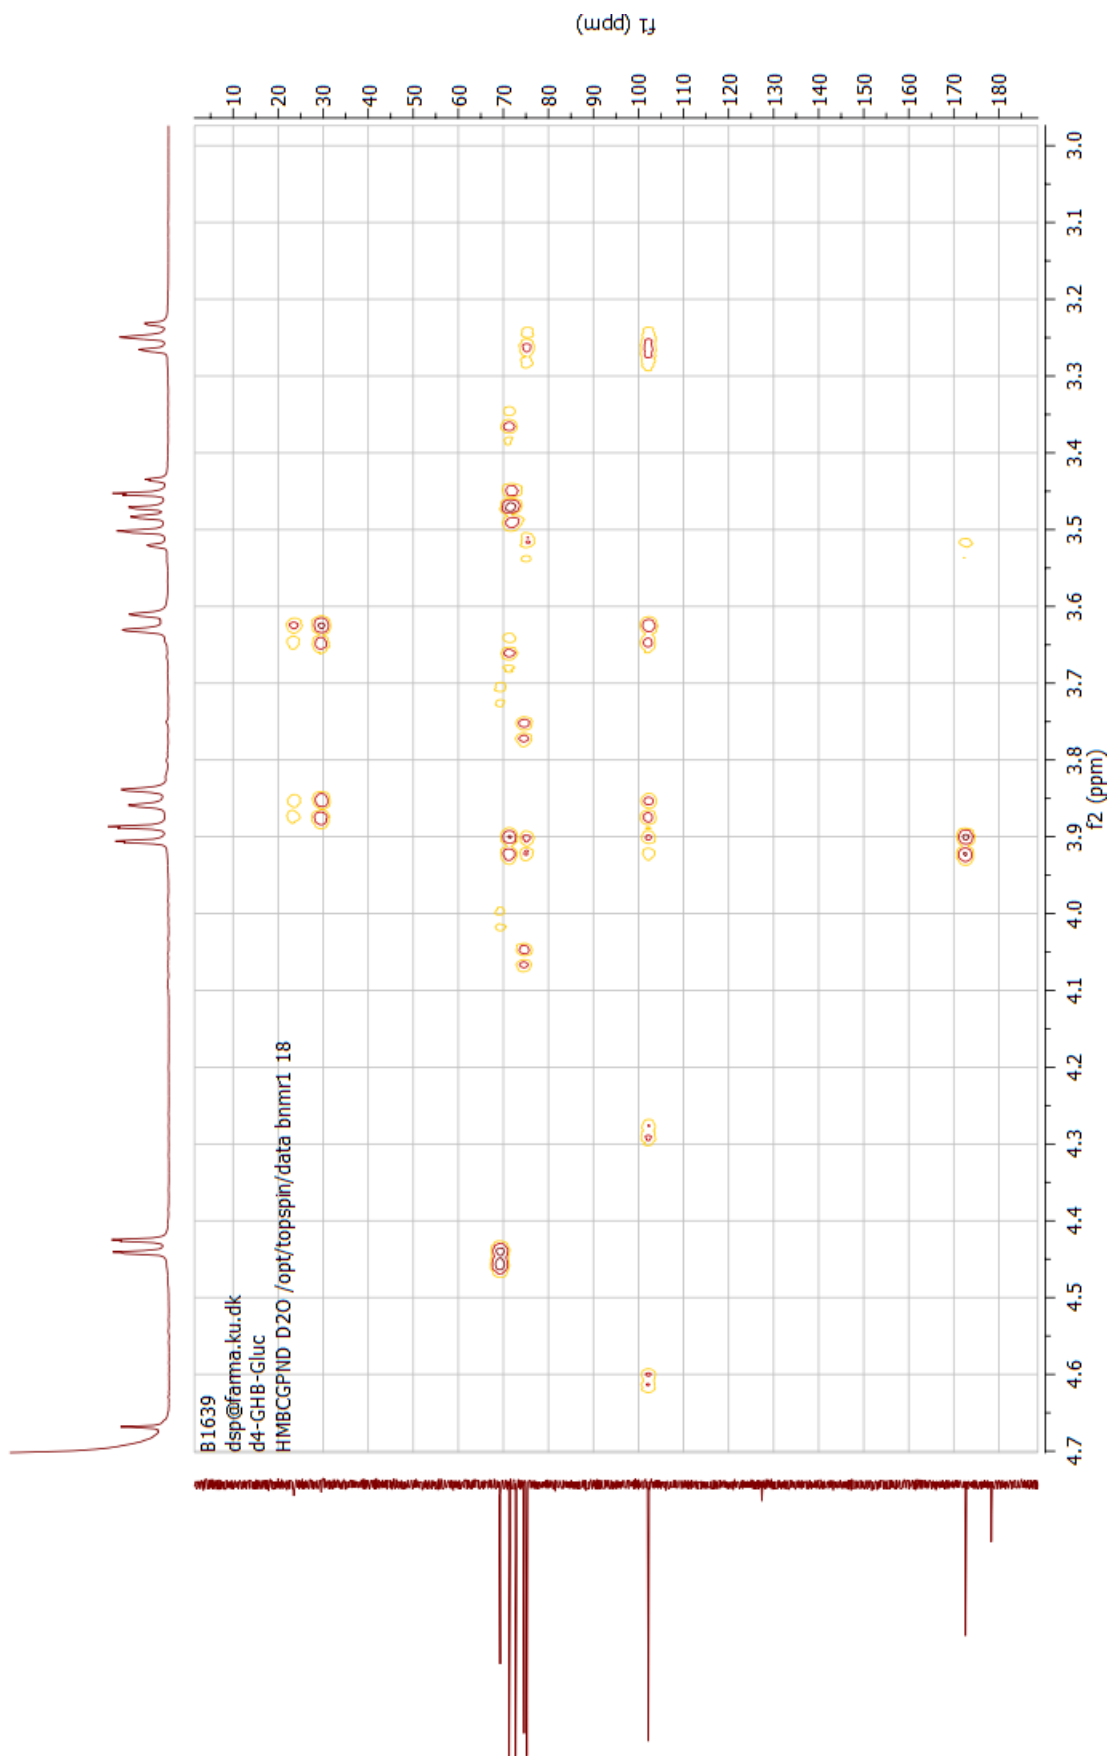

## 2. NMR stability study for GHB-GLUC (2)

### 2.1 General NMR experimental

All NMR spectra were recorded on a Bruker 500 MHz Avance III NMR spectrometer. A Watergate-type water-suppression pulse sequence using excitation sculpting with gradients was employed (zgesgp) [1].

#### Stock solutions:

**Buffer A:** 10 mM sodium phosphate monobasic (monohydrate) in 90% H<sub>2</sub>O/10 D<sub>2</sub>O. pH = 4.8.

**Buffer B:** 10 mM sodium phosphate dibasic (heptahydrate) in 90% H<sub>2</sub>O/10 D<sub>2</sub>O. pH = 9.0.

Buffers were prepared by dissolving the appropriate salt (**A**: 1.38 g and **B**: 2.68 g) in 10 mL D<sub>2</sub>O and adjusting the volume to 100 mL with mQ water.

pH was determined using a Radiometer Copenhagen PHM92 pH meter after calibration using IUPAC calibration solutions pH 4.005 and 10.012 from Radiometer Analytical.

**Internal standard:** 0.1 M *t*-BuOH in H<sub>2</sub>O. 0.74 g *t*-BuOH was dissolved in H<sub>2</sub>O to give a final volume of 100 mL.

**NMR buffer A with internal standard:** Prepared by taking 800 µL internal standard solution and adding Buffer A to give a final volume of 20 mL (final *t*-BuOH concentration 4 µM).

**NMR buffer B with internal standard:** Prepared by taking 800 µL internal standard solution and adding Buffer B to give a final volume of 20 mL (final *t*-BuOH concentration 4 µM).

#### Determination of integration accuracy:

Watergate-type water suppression during NMR experiments can affect integration accuracy. Hence the NMR method was validated by measuring known concentrations of GHB and comparing them to an internal standard (*t*-BuOH). Three samples with increasing

concentration of *t*-BuOH relative to GHB were analyzed by  $^1\text{H}$  NMR. Integration in  $^1\text{H}$  NMR spectra was accurate for all three GHB methylene groups over the examined concentration range (deviation  $< \pm 1\%$ ).

NMR samples for determining integration accuracy:

GHB (3.0 mg) was dissolved in NMR buffer A with internal standard (1.0 mL) to give NMR sample C = 1.

NMR sample C = 1 (0.5 mL) was diluted with NMR buffer with internal standard (0.5 mL) to give NMR sample C = 2.

NMR sample C = 2 (0.5 mL) was diluted with NMR buffer with internal standard (0.5 mL) to give NMR sample C = 4.

**NMR Samples**

**GHB-GLUC** (1 mg, 3.6  $\mu\text{mol}$ ) was dissolved in NMR buffer A with internal standard (0.6 mL).

**GHB-GLUC** (1 mg, 3.6  $\mu\text{mol}$ ) was dissolved in NMR buffer B with internal standard (0.6 mL).

The stability of GHB-GLUC in both buffer systems was evaluated over time at 18, 60 and 90 °C.

Reference spectra ( $^1\text{H}$  and  $^{13}\text{C}$ ):

- a) *t*-BuOH (12 mg) in 10%  $\text{D}_2\text{O}$  in  $\text{H}_2\text{O}$  (1.0 mL).
- b)  $\gamma$ -Butyrolactone (2 mg) in NMR buffer A (1.0 mL).
- c)  $\gamma$ -Hydroxybutyric acid in NMR buffer A. Integration experiment at  $[C] = 1, 2$  and 4 (vide supra).
- d)  $\beta$ -D-Glucuronic acid (2 mg) in NMR buffer A (1.0 mL).

2.2 NMR stability study <sup>1</sup>H NMR spectra

<sup>1</sup>H NMR of 2 in NMR buffer A with internal standard at 18 °C (0–120 h)

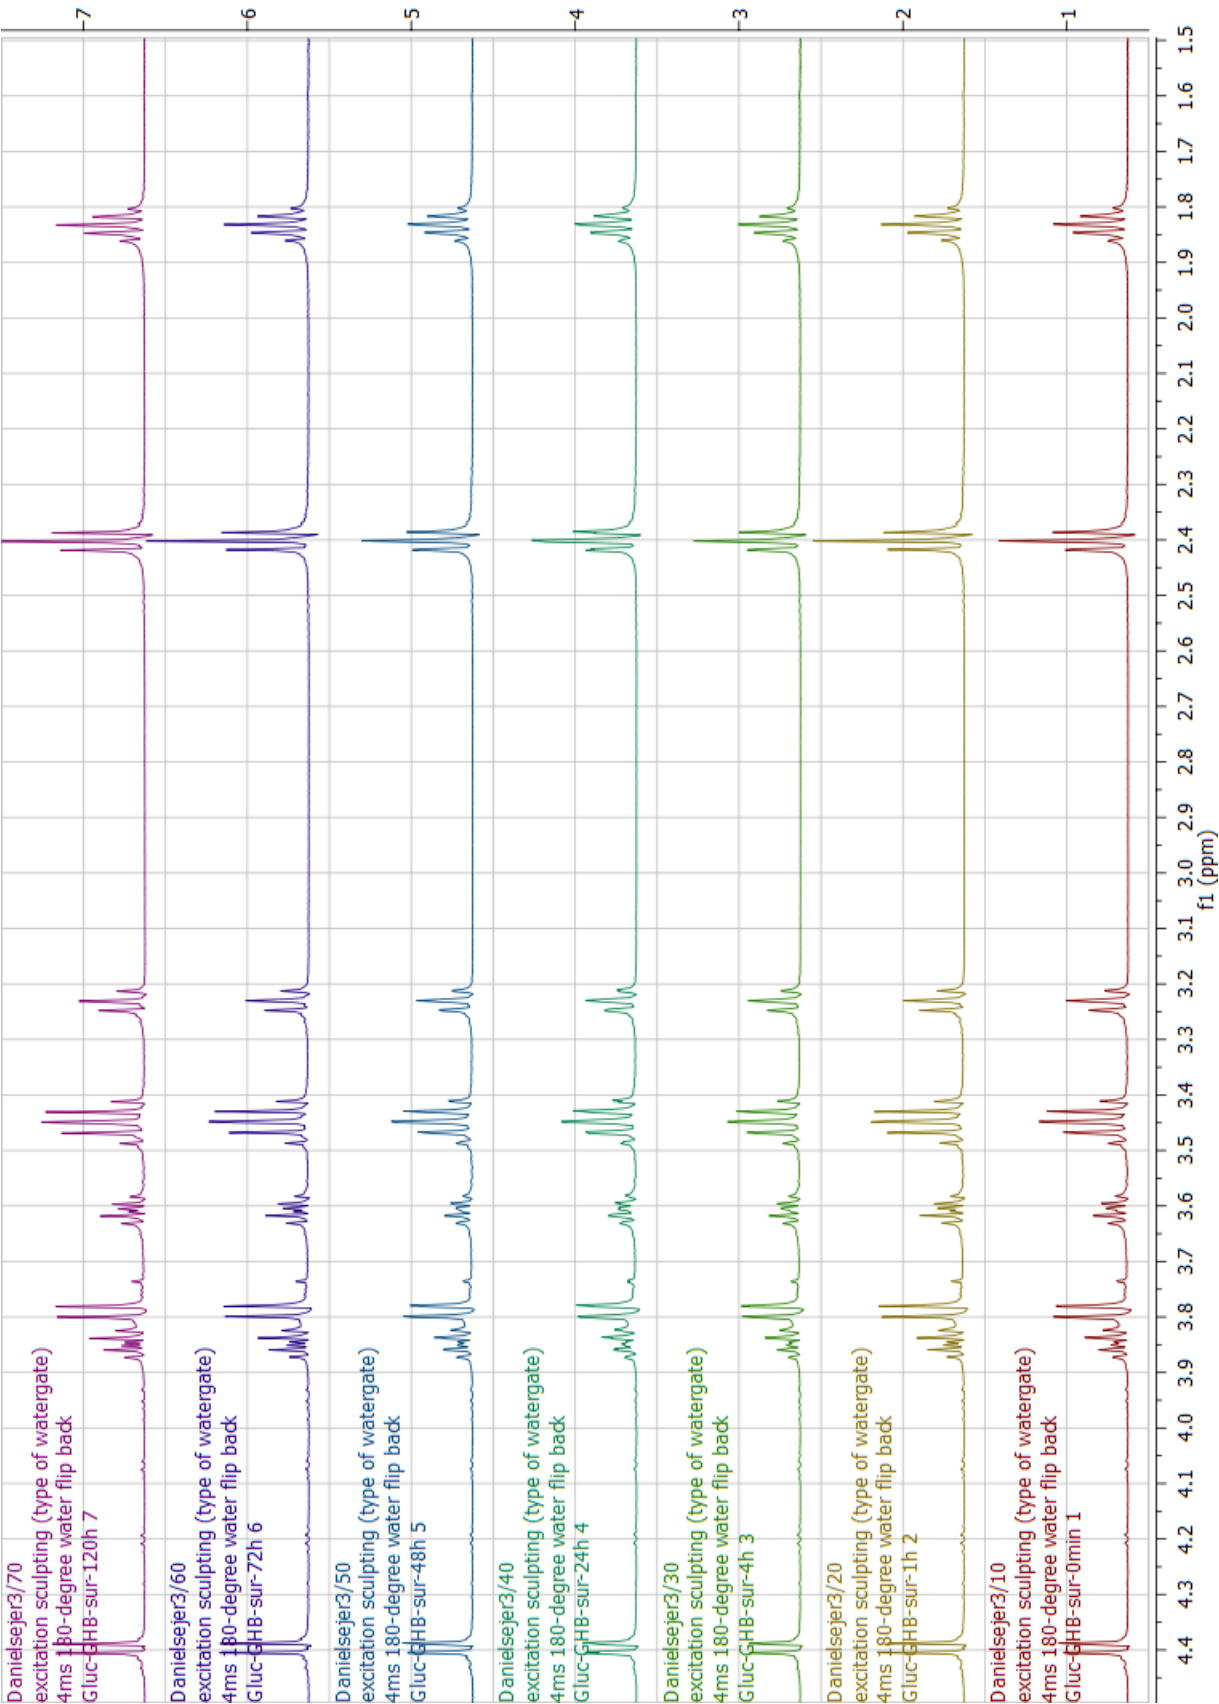

$^1\text{H}$  NMR of 2 in NMR buffer A with internal standard at 60 °C (0.5–24 h) and 90 °C (1–72 h)

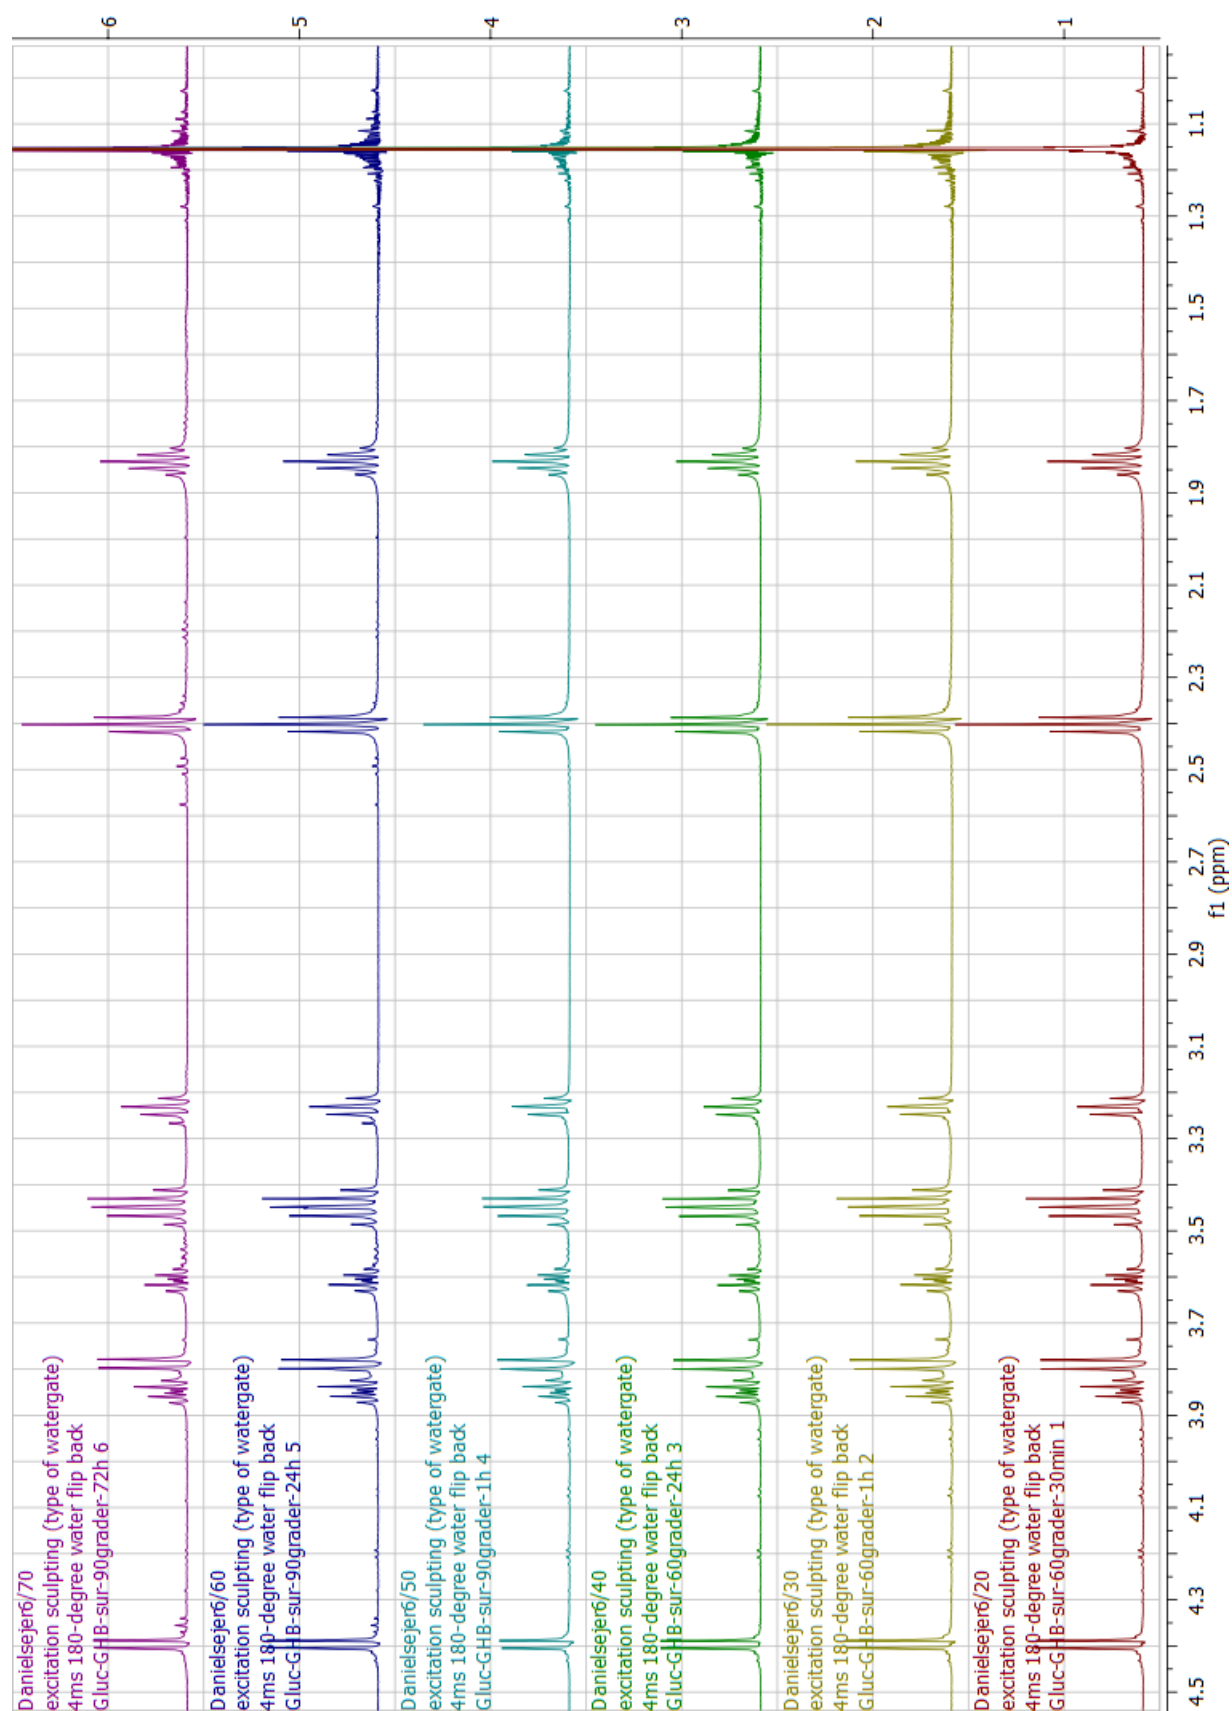



$^1\text{H}$  NMR of 2 in NMR buffer B with internal standard at 60 °C (0.5–24 h) and 90 °C (1–72 h)

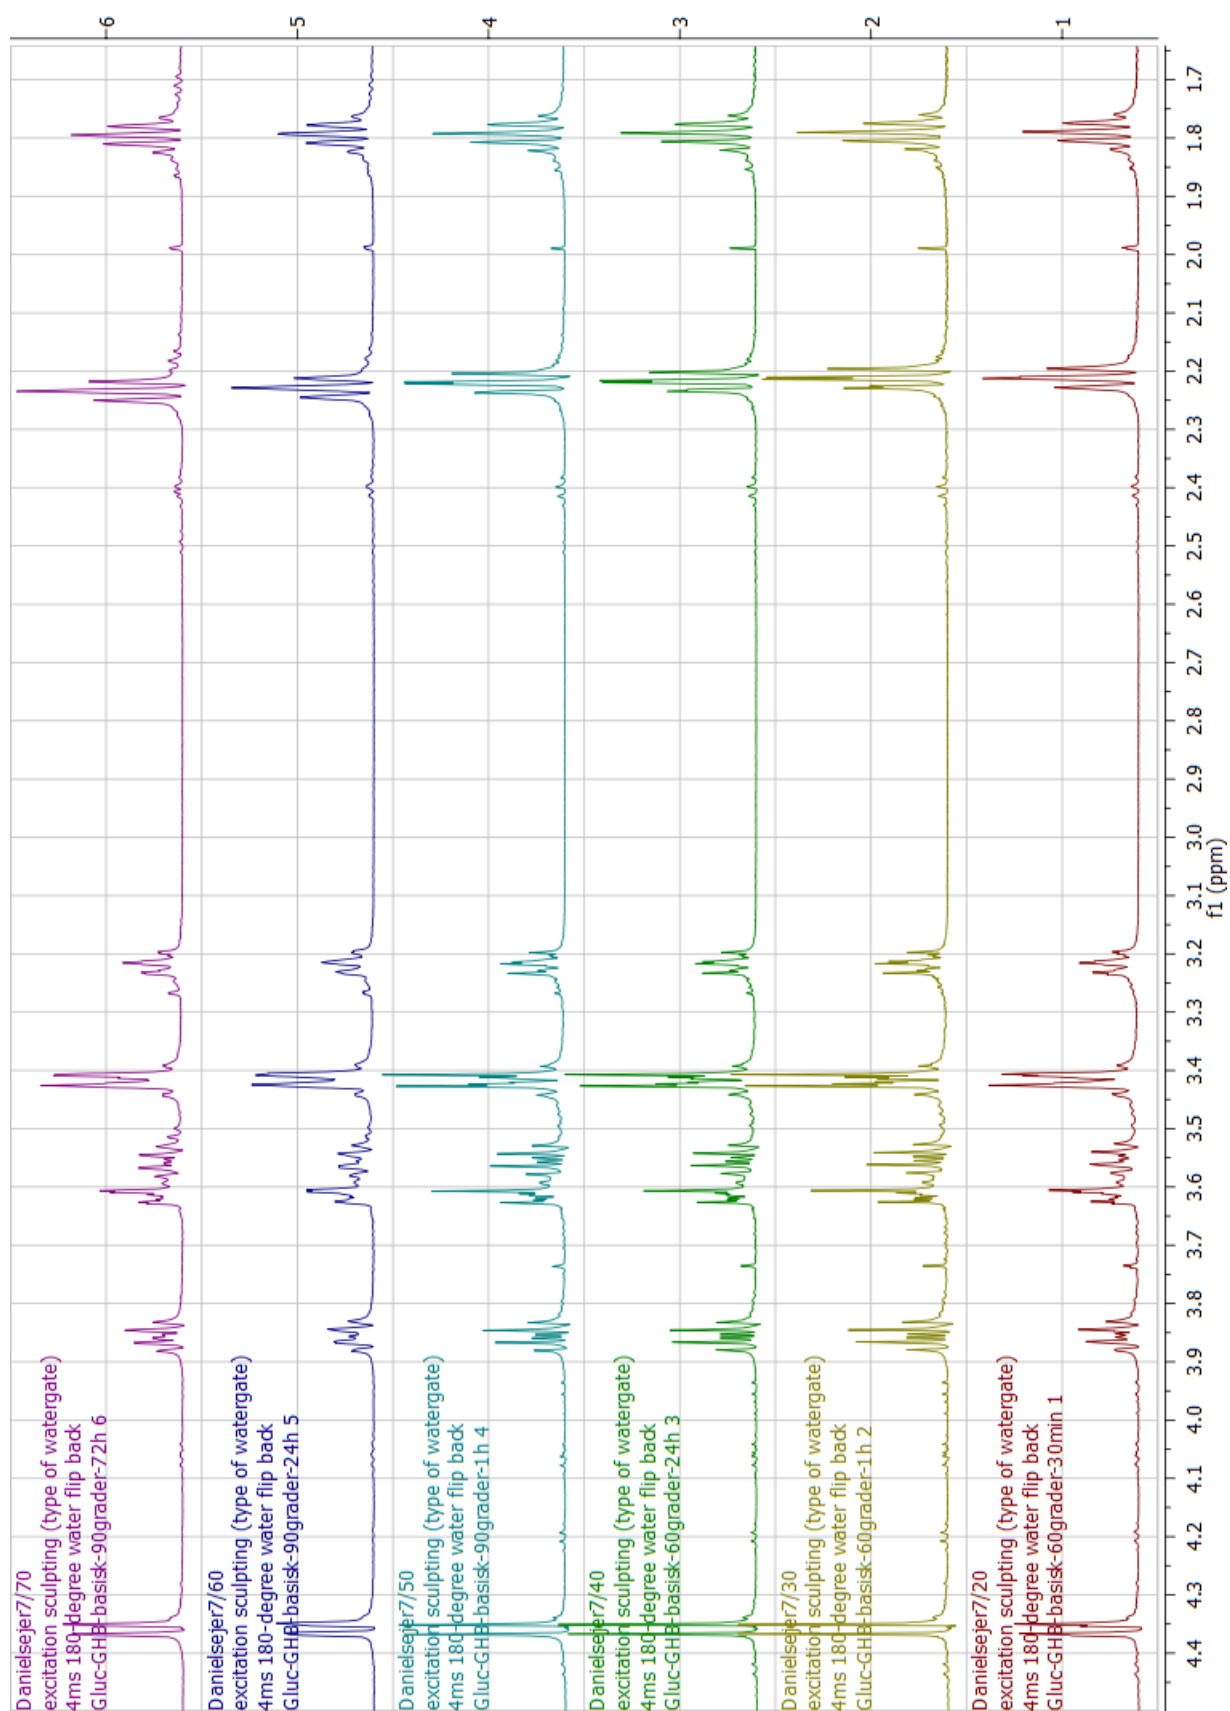

## 2.3 NMR reference spectra

### $^1\text{H}$ NMR of *t*-BuOH in 10% $\text{D}_2\text{O}$ in $\text{H}_2\text{O}$

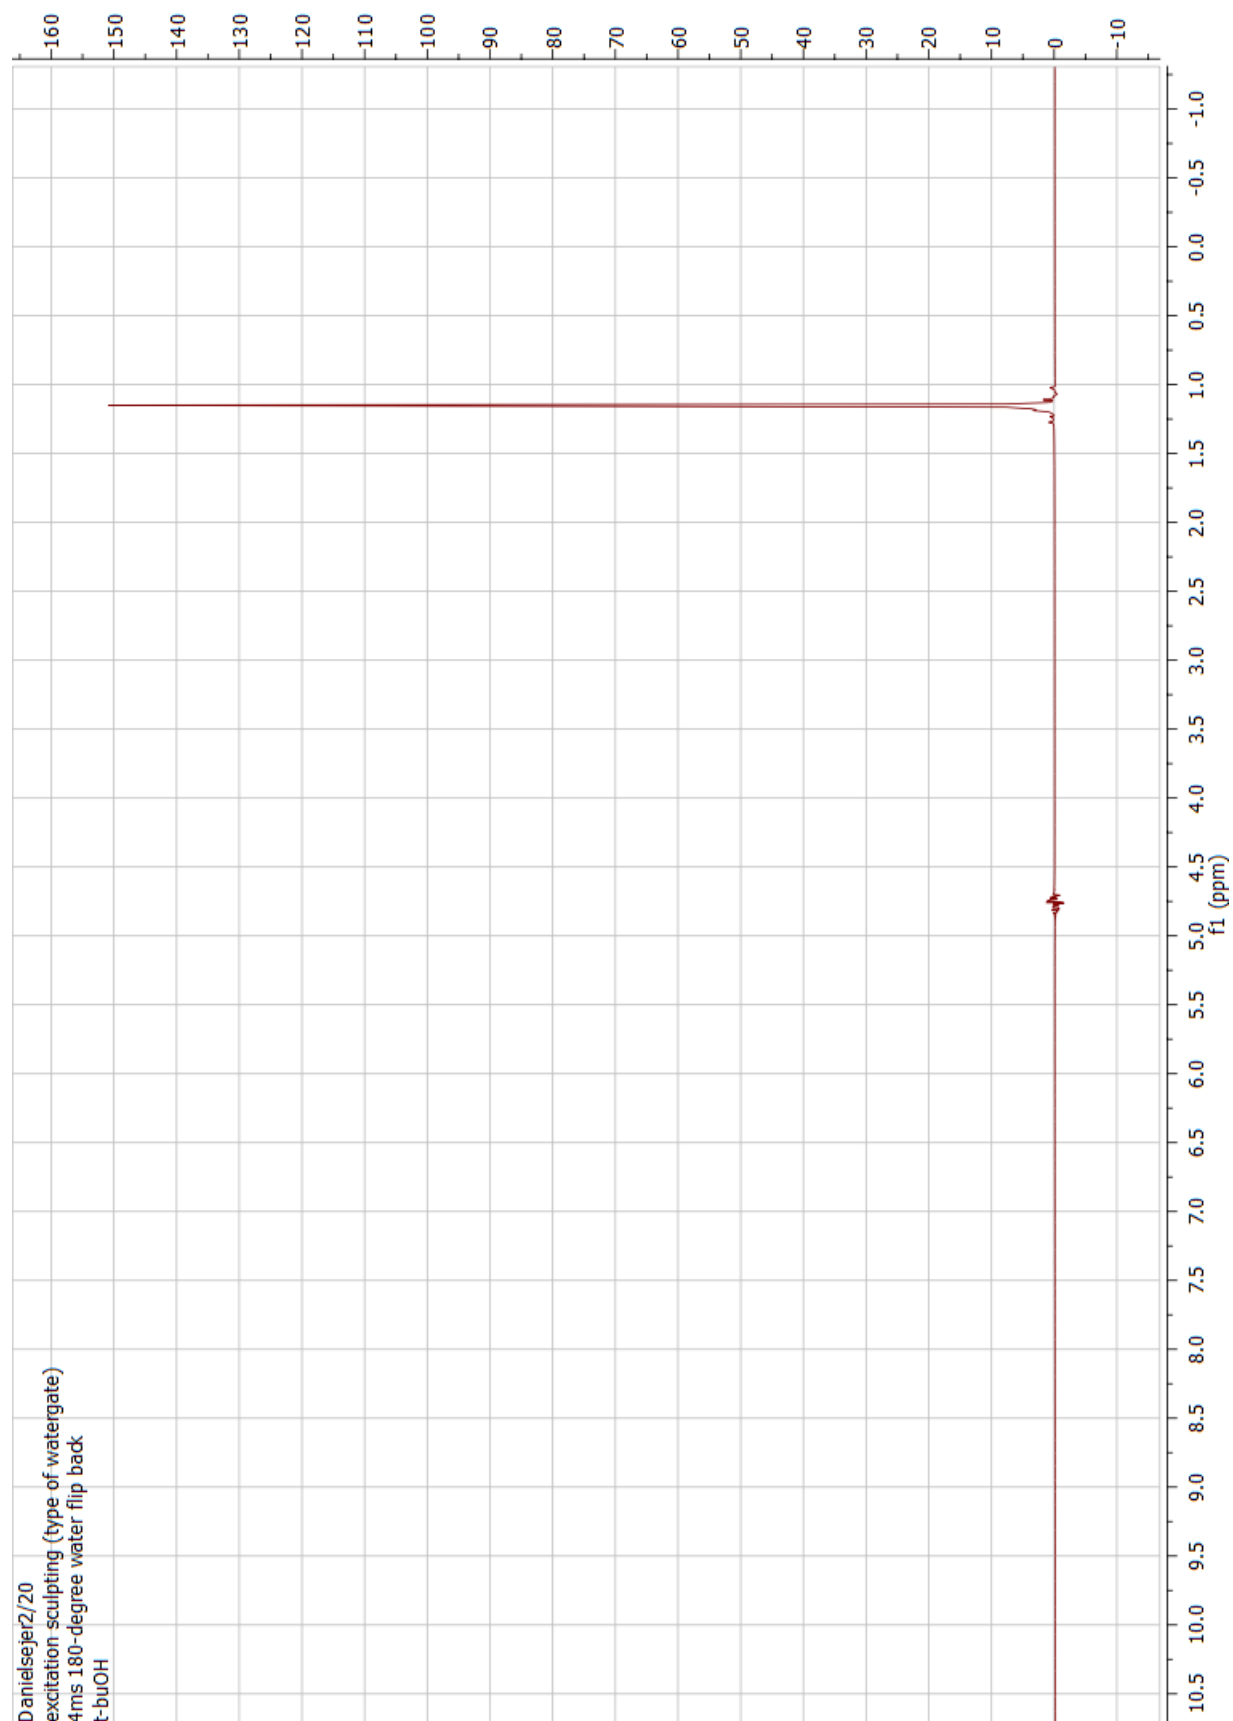

**$^{13}\text{C}$  APT NMR of *t*-BuOH in 10%  $\text{D}_2\text{O}$  in  $\text{H}_2\text{O}$**

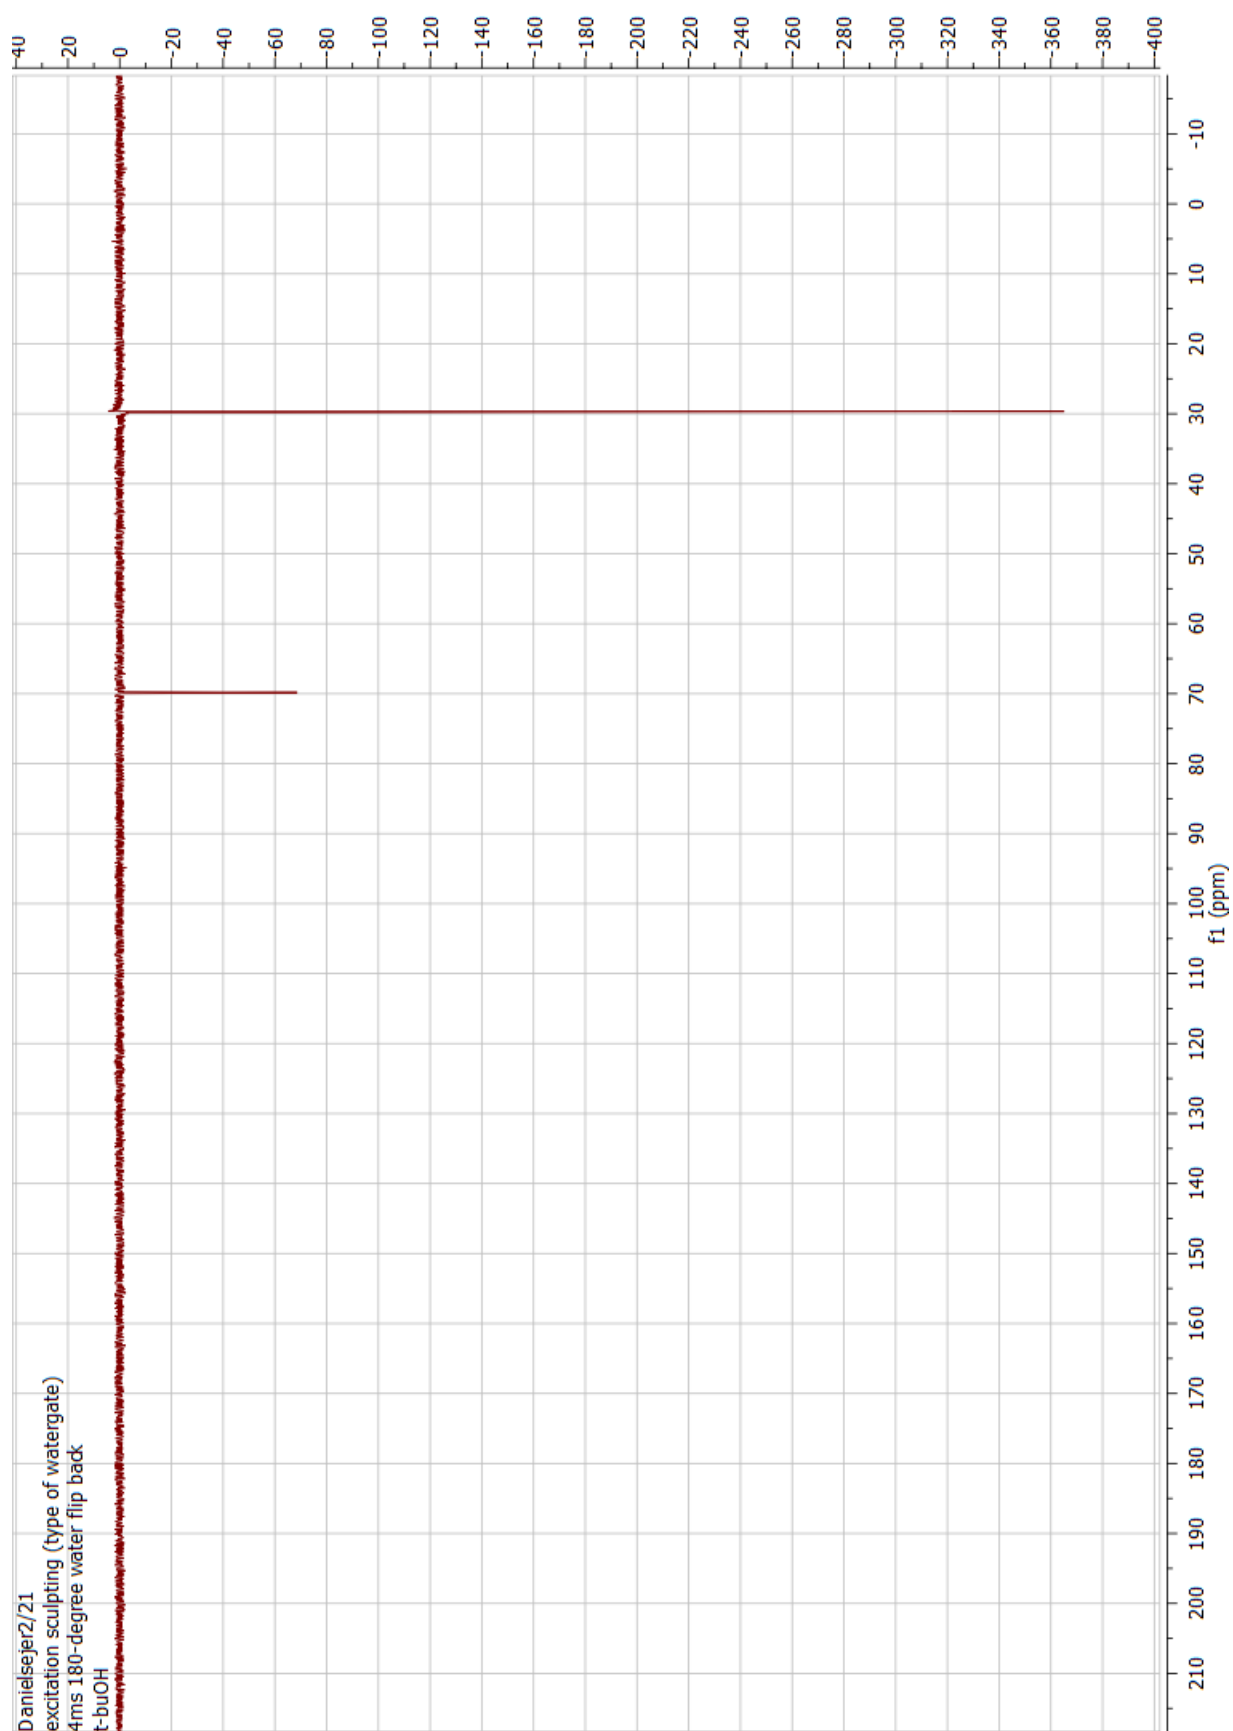

**<sup>1</sup>H NMR of γ-butyrolactone (GBL) in NMR buffer A**

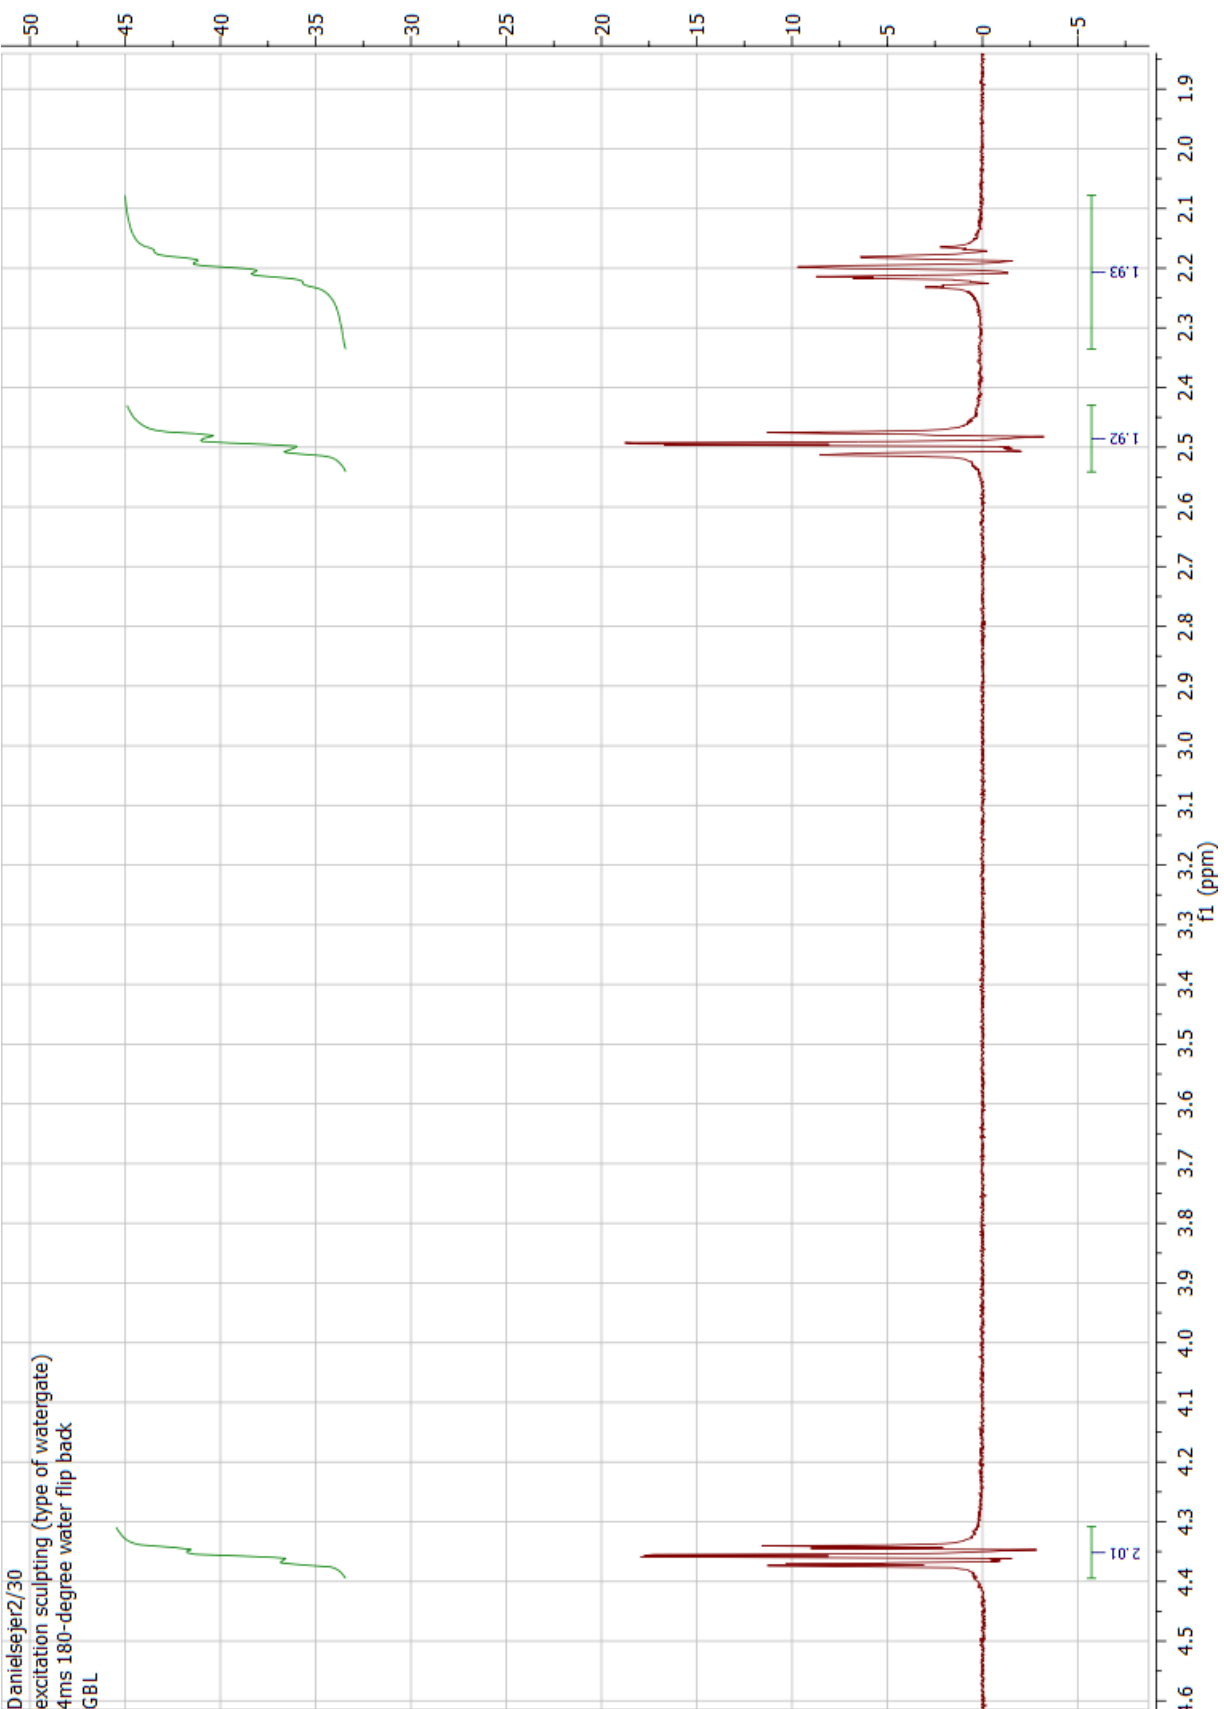

**<sup>13</sup>C NMR of γ-butyrolactone (GBL) in NMR buffer A**

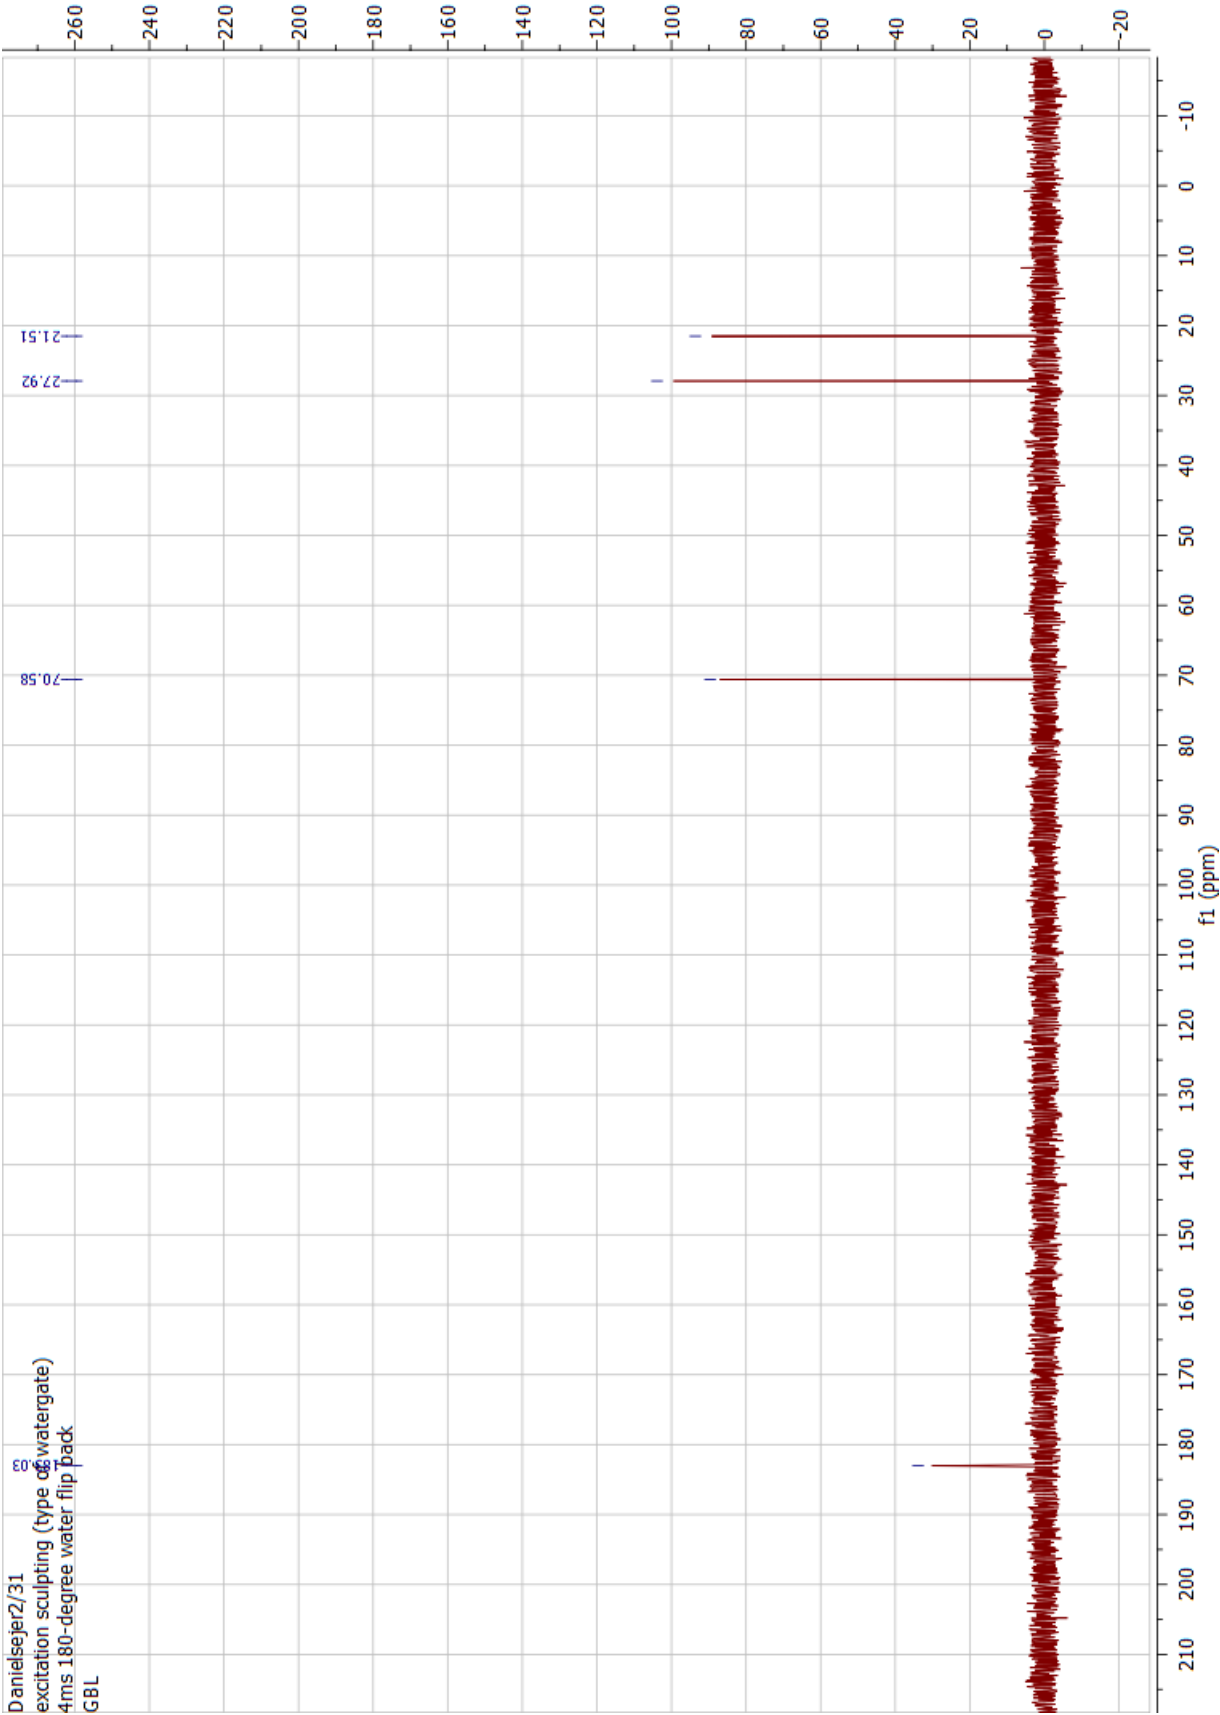

**$^1\text{H}$  NMR of  $\gamma$ -hydroxybutyric acid (GHB) in NMR buffer A,  $[\text{C}] = 1$**

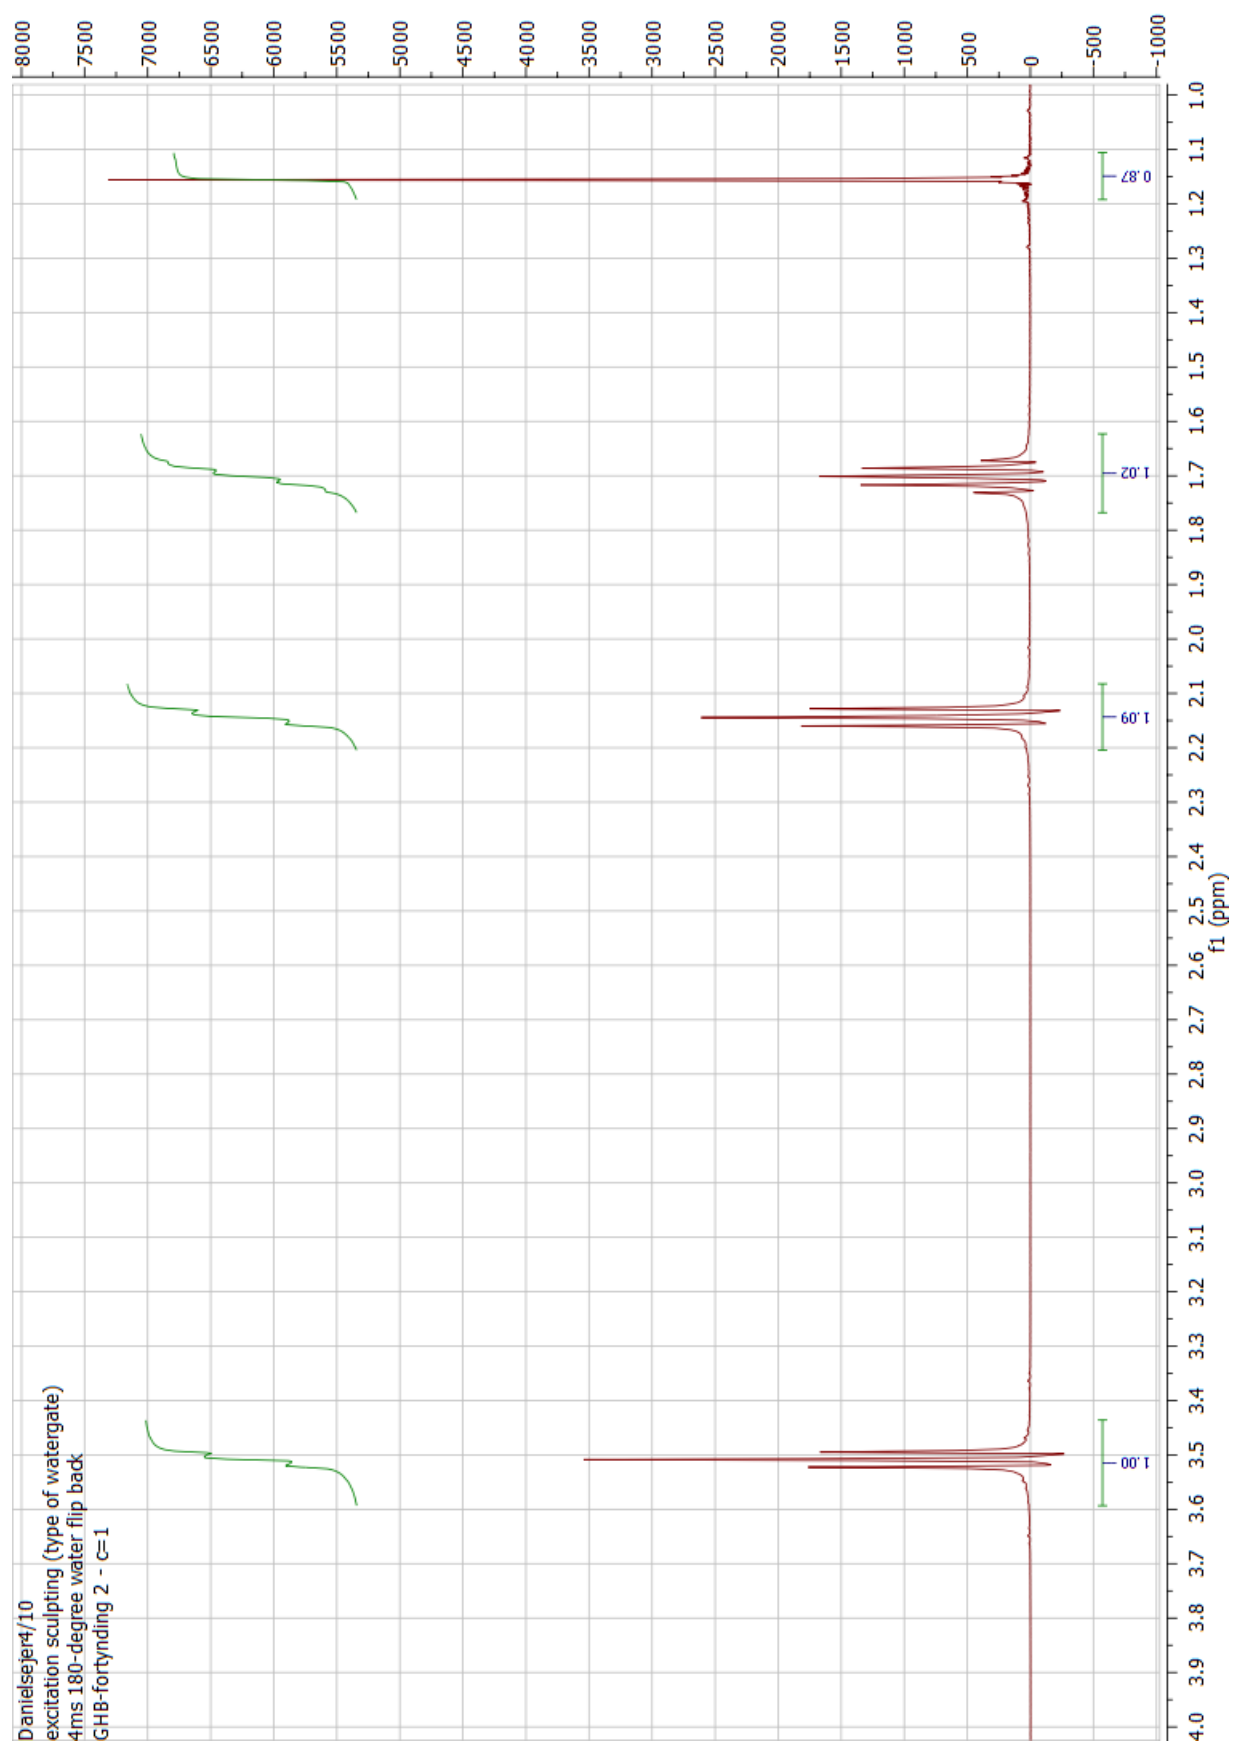

**$^1\text{H}$  NMR of  $\gamma$ -hydroxybutyric acid (GHB) in NMR buffer A,  $[\text{C}] = 2$**

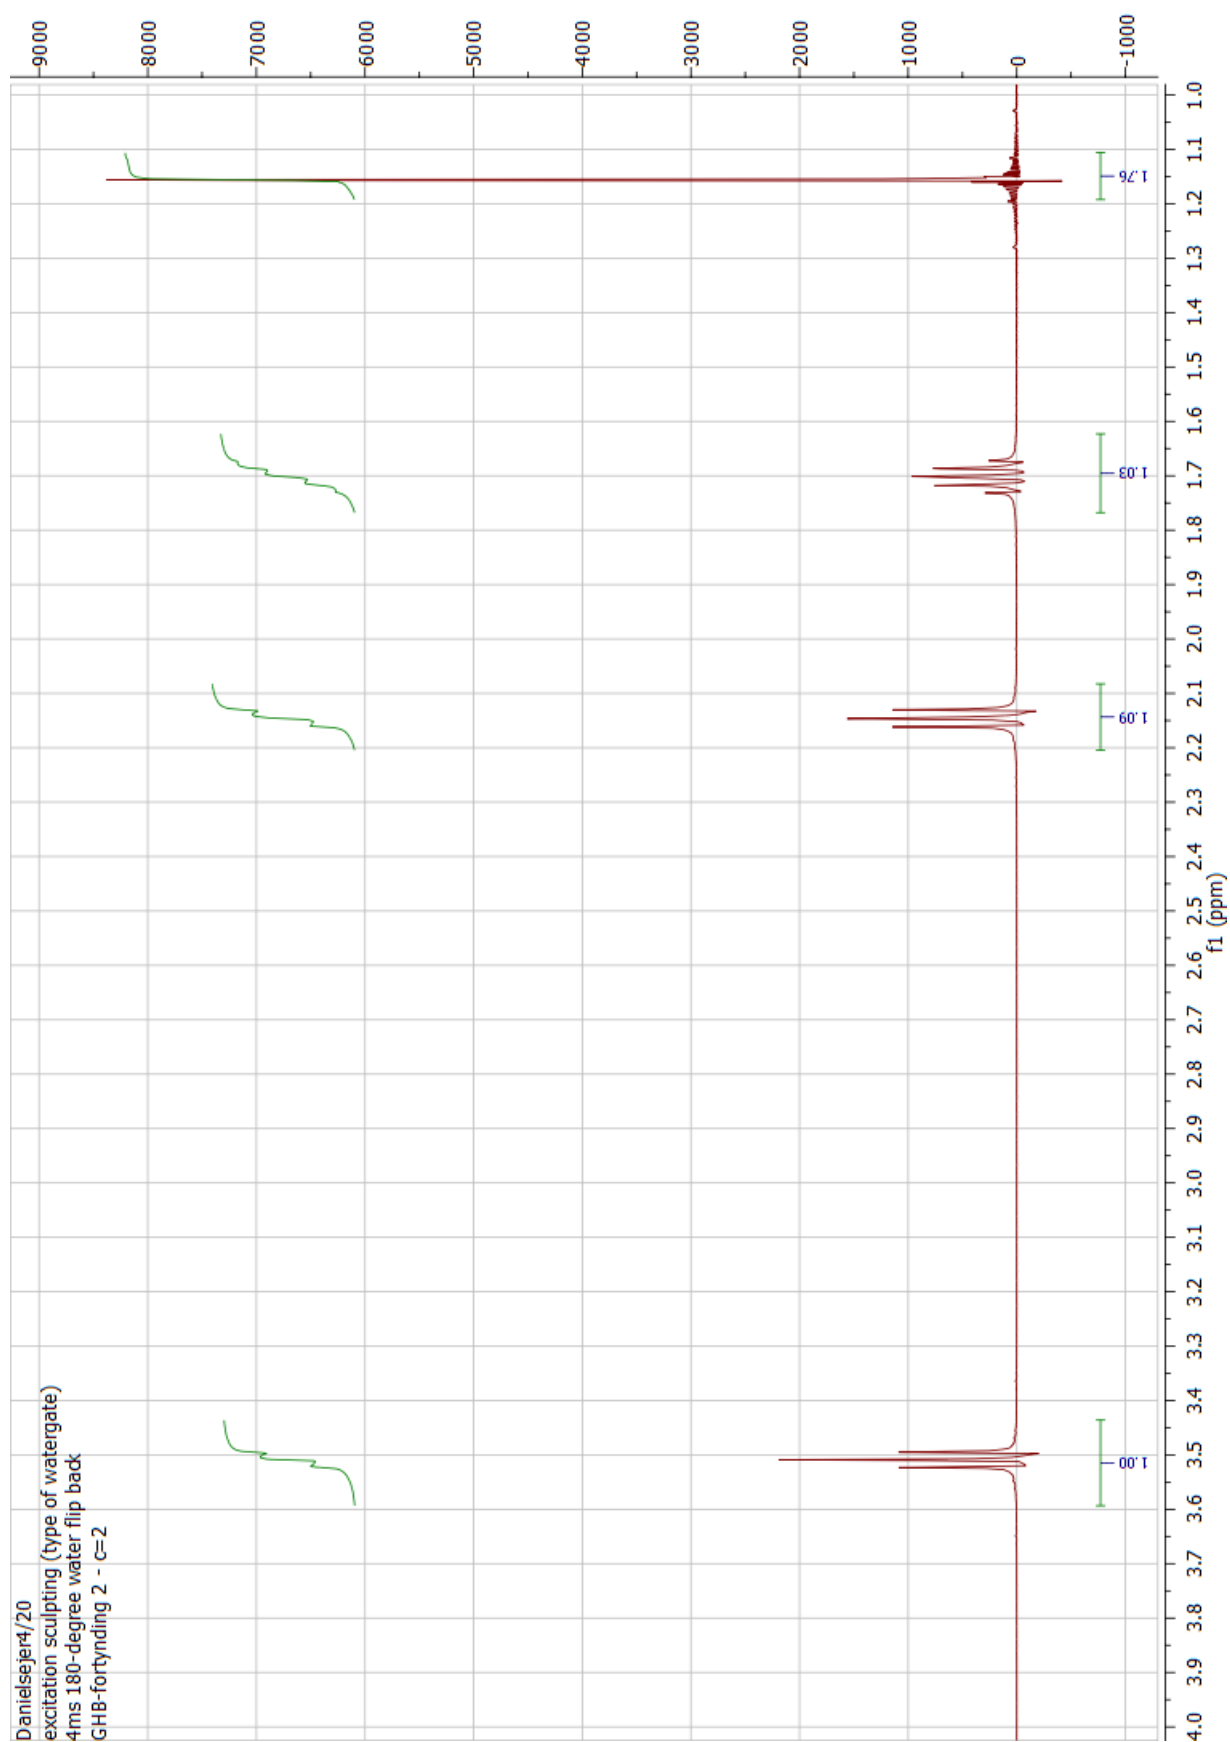

**$^1\text{H}$  NMR of  $\gamma$ -hydroxybutyric acid (GHB) in NMR buffer A,  $[\text{C}] = 4$**

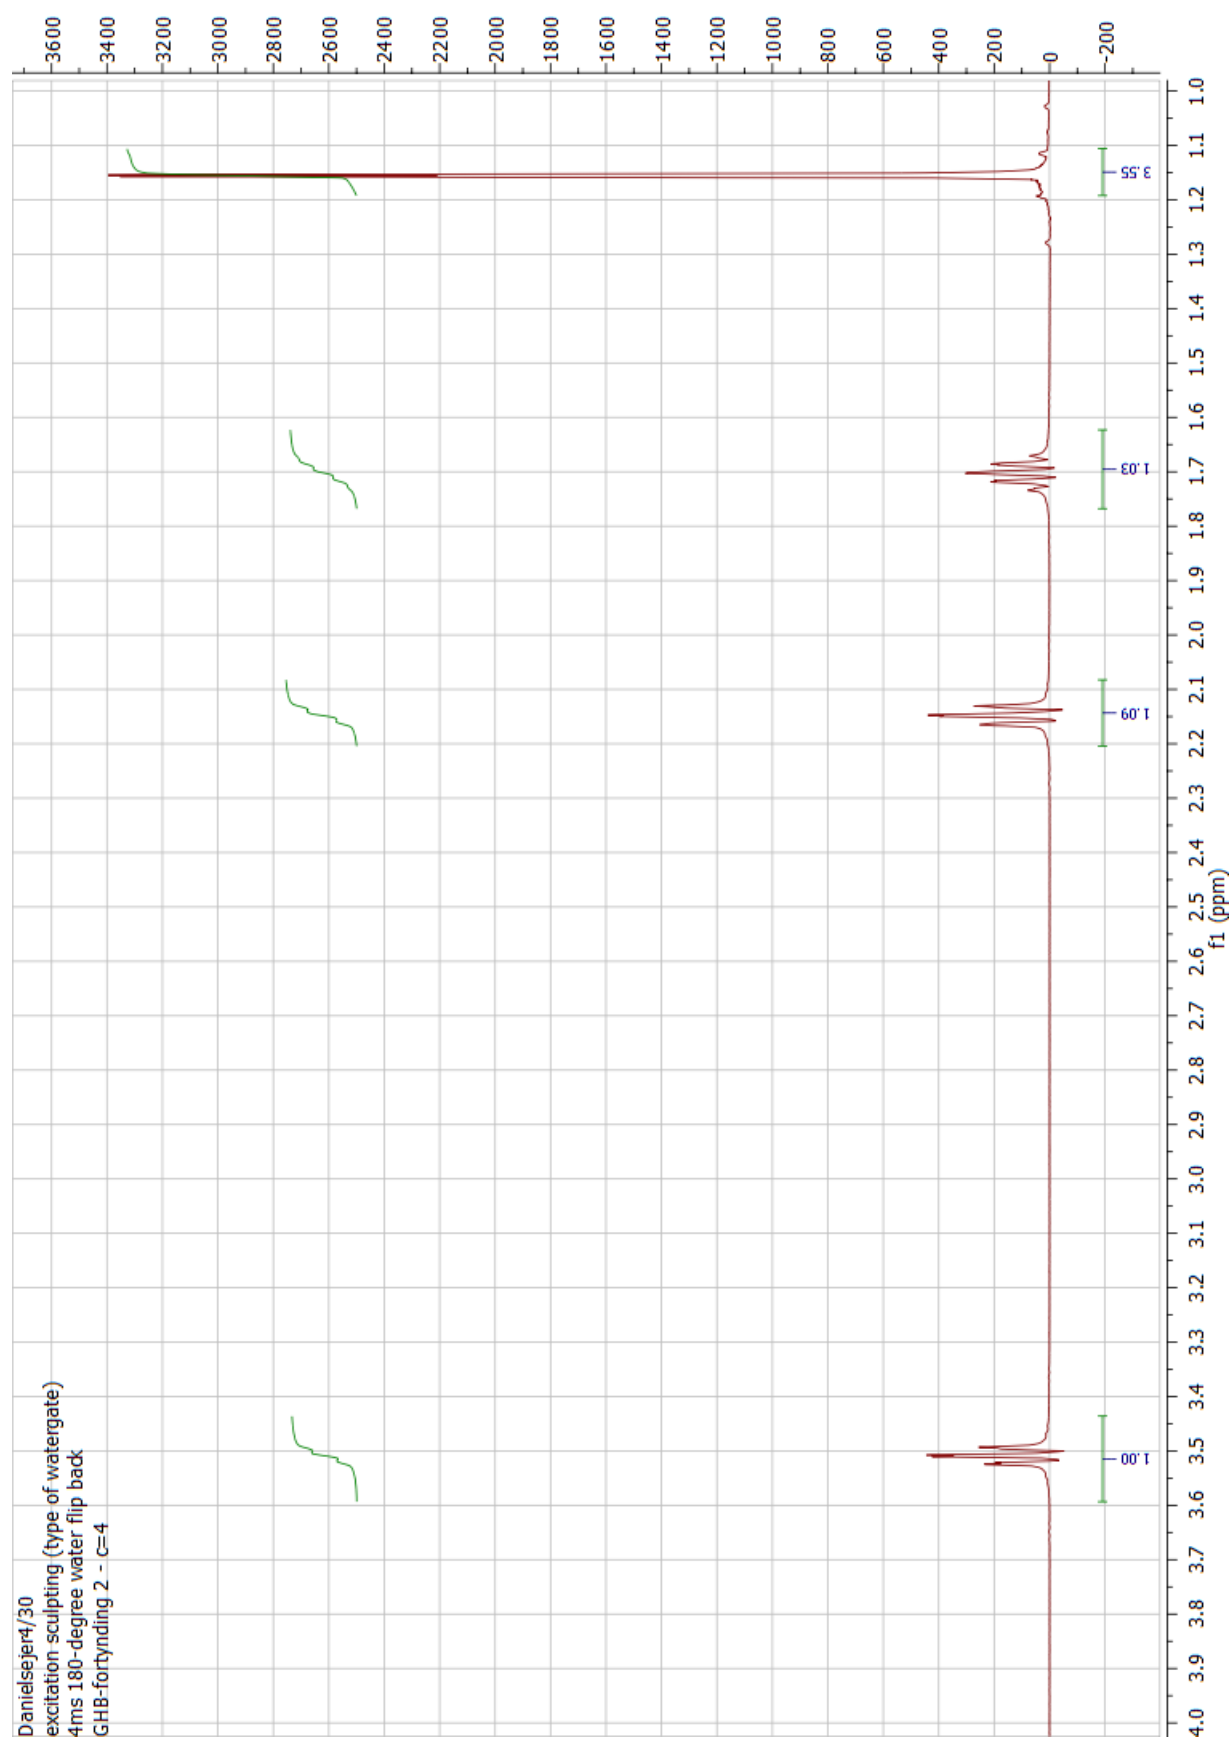



# <sup>1</sup>H NMR of β-D-glucuronic acid in NMR buffer A

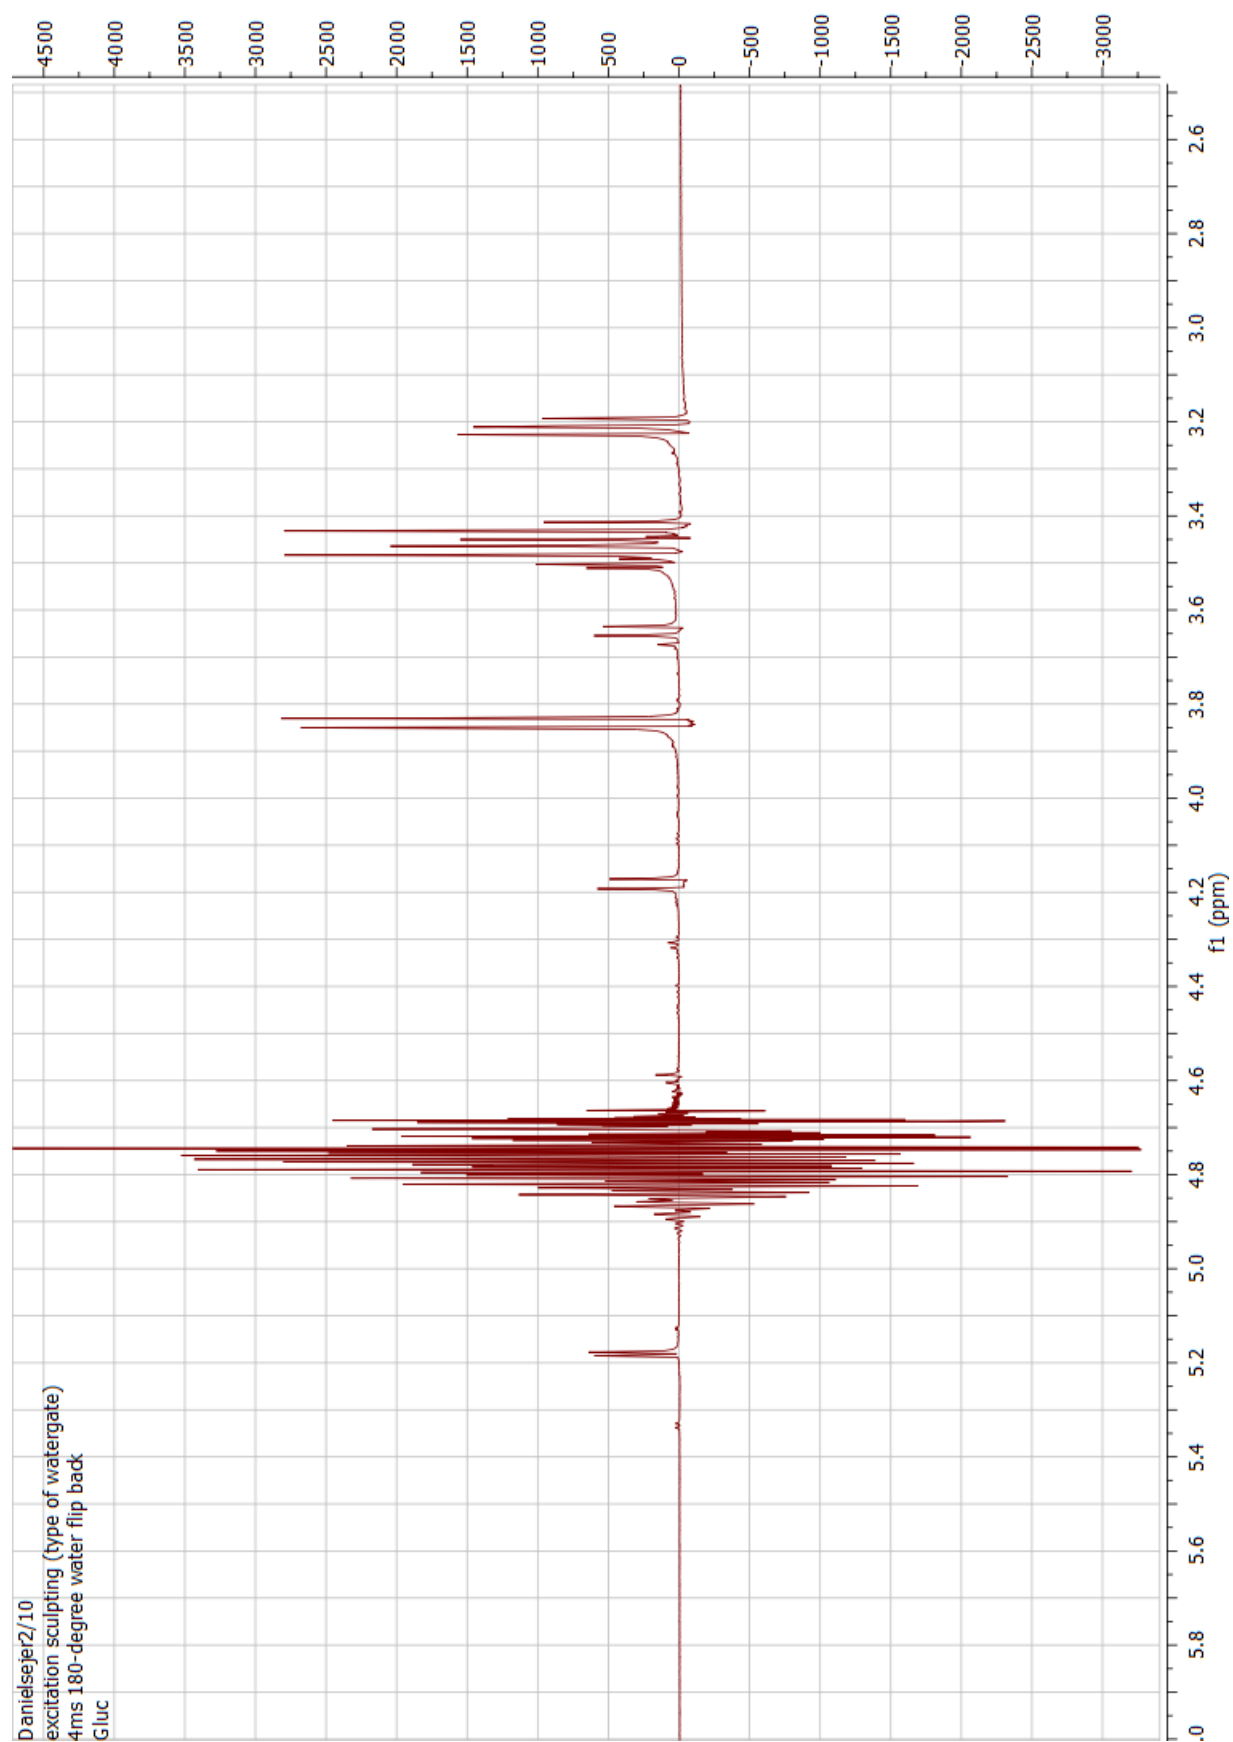

<sup>13</sup>C NMR of β-D-glucuronic acid in NMR buffer A

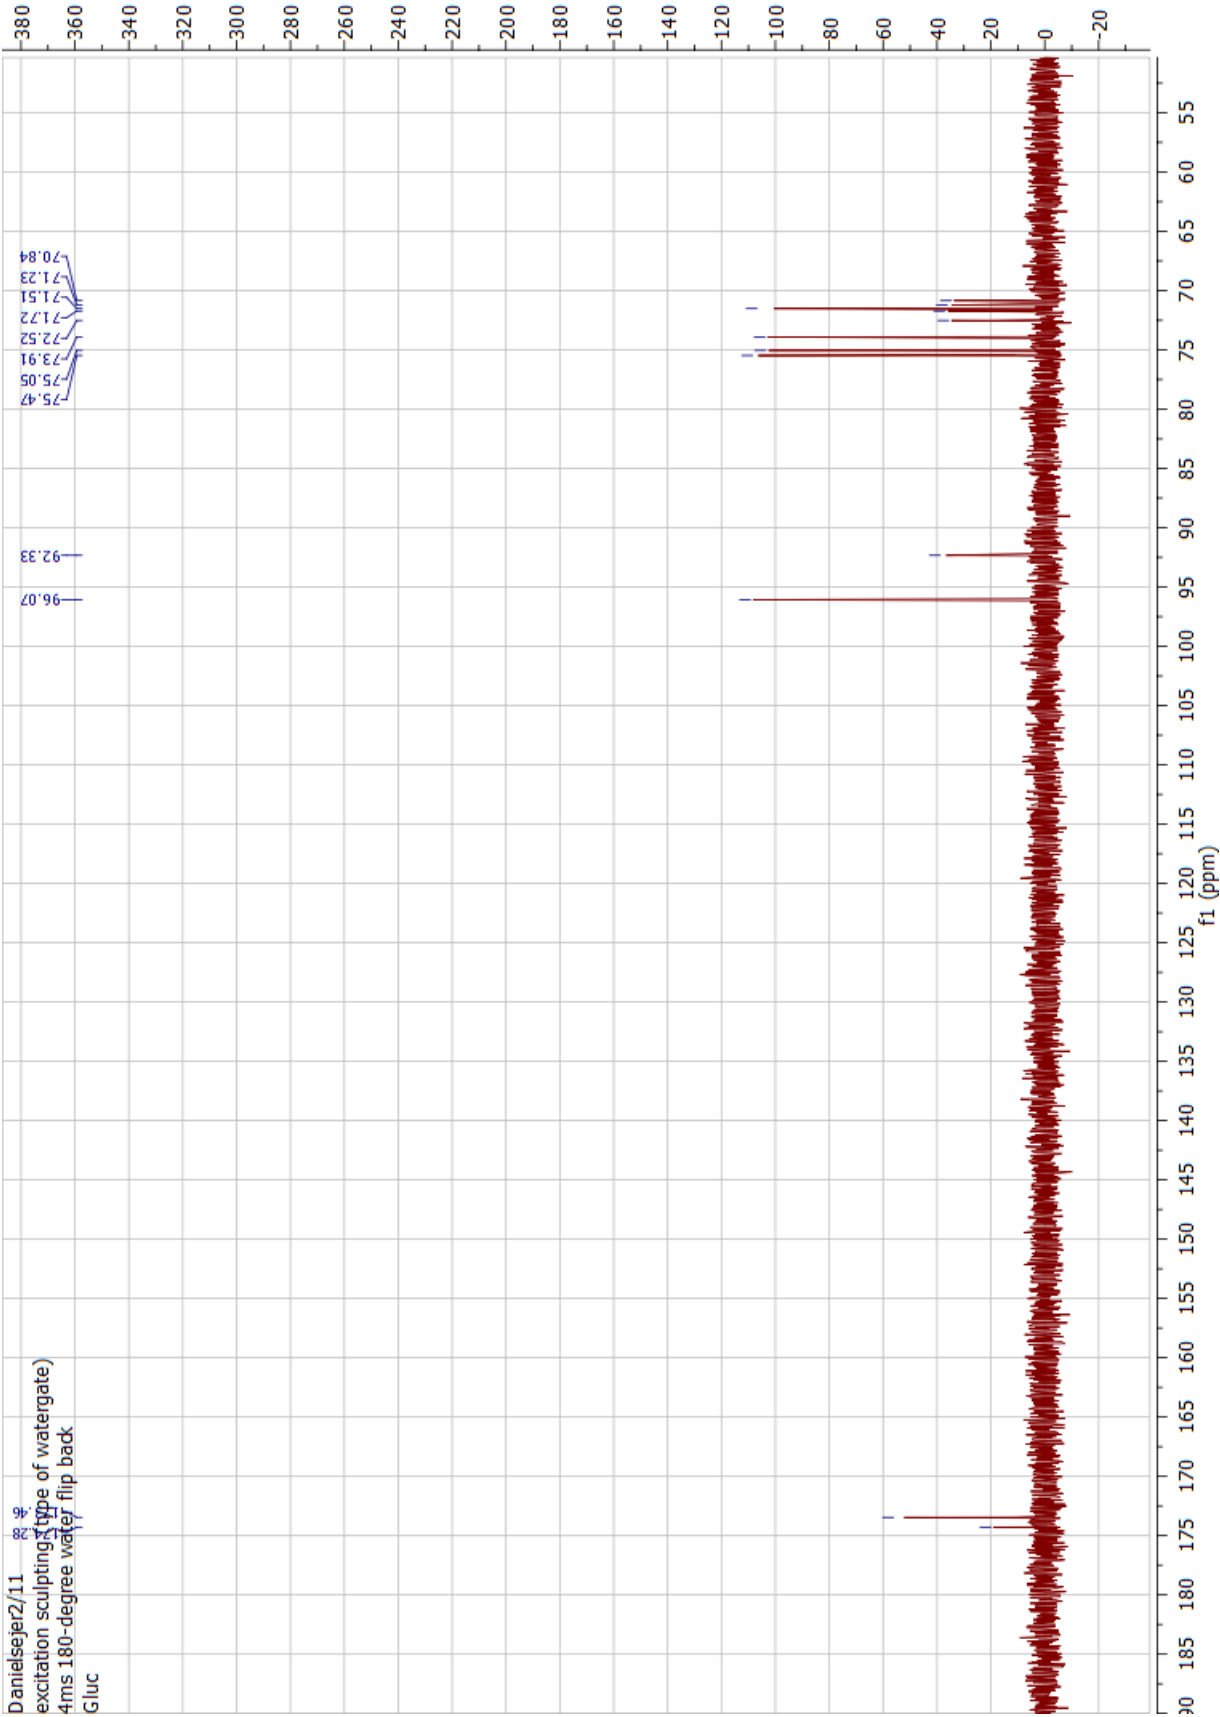

## Reference

- [1] Hwang, T. L.; Shaka, A. J. *J. Mag. Reson. Series A* **1995**, 112, 275–279
